Title: Apolipoprotein  $\epsilon 4$  modifies obesity-related atrophy in the hippocampal formation of cognitively healthy adults.

Authors: Bethany M. Coad<sup>1</sup>, Parisa A. Ghomroudi<sup>1</sup>, Rebecca Sims<sup>2</sup>, John P. Aggleton<sup>3</sup>, Seralynne D. Vann<sup>3</sup>, Claudia Metzler-Baddeley<sup>1,&</sup>,

Affiliation:

<sup>1</sup> Cardiff University Brain Research Imaging Centre (CUBRIC), School of Psychology, Cardiff University, Maindy Road, Cathays, Cardiff, CF24 4HQ;

<sup>2</sup> Psychological Medicine and Clinical Neurosciences, School of Medicine, Cardiff University, Maindy Road, Cathays, Cardiff, CF24 4HQ, UK

<sup>3</sup> School of Psychology, Cardiff University, Tower Building, 70 Park Place, Cardiff CF10 3AT.

<sup>&</sup>Corresponding author:

Claudia Metzler-Baddeley, (<http://orcid.org/0000-0002-8646-1144>) CUBRIC, Maindy Road, Cardiff CF24 4HQ, Email: [Metzler-BaddeleyC@cardiff.ac.uk](mailto:Metzler-BaddeleyC@cardiff.ac.uk), Phone: +44 (0)28 2087 0705

Author contributions:

CM-B: conceptualization, methodology, formal analysis, writing – original draft preparation, writing – review & editing, visualization, project administration, funding acquisition; BMC & PAG: formal analysis and writing of manuscript, RS: Resources & Analysis, JPA, SV: Writing – Review & Editing.

## Abstract

Characterizing age- and risk-related hippocampal vulnerabilities may inform about the neural underpinnings of cognitive decline. We studied the impact of three risk-factors, Apolipoprotein (*APOE*)- $\epsilon$ 4, a family history of dementia, and central obesity, on CA1, CA2/3, dentate gyrus (DG) and subiculum in 158 cognitively healthy adults (38-71 years). Subfields were labelled with the Automatic Segmentation of Hippocampal Subfields (ASHS) and FreeSurfer (version 6) protocols. Volumetric and microstructural measurements from quantitative magnetization transfer and Neurite Orientation Density and Dispersion Imaging were extracted for each subfield and reduced to three principal components capturing apparent myelin/neurite packing, size/complexity, and metabolism. Aging was associated with an inverse U-shaped curve on myelin/neurite packing and affected all subfields. Obesity led to reductions in myelin/neurite packing and size/complexity regardless of *APOE* and FH status. However, amongst individuals with a healthy Waist-Hip-Ratio, *APOE*  $\epsilon$ 4 carriers showed lower size/complexity than non-carriers. Protocol type did not affect this risk pattern. These findings provide novel evidence for interactive effects between *APOE* and central obesity on the hippocampal formation of cognitively healthy adults.

**Keywords:** Hippocampal subfields, ASHS, FreeSurfer, aging, dementia risk, family history, *APOE*, obesity, quantitative magnetization transfer, NODDI

## Highlights

- Age-related inverted U-shaped curve of hippocampal myelin/neurite packing
- Obesity-related reductions of hippocampal myelin/neurite packing and size/complexity
- *APOE* modifies the effects of obesity on hippocampal size/complexity
- Age-related slowing of spatial navigation
- No *APOE*, family history, or obesity effects on cognition

## 1. Introduction

The world's population is aging, creating an increase in age-related health issues, including cognitive decline (Beard et al., 2016). With respect to age-related memory impairments, the hippocampal formation, i.e., dentate gyrus, cornu Ammonis (CA) fields, and subiculum, warrants particular attention as it is critically involved in memory processing and is affected early in the progression of Alzheimer's disease (AD). Magnetic resonance imaging (MRI) studies have, for example, shown reductions in total hippocampal volume associated with aging in cognitively healthy individuals (Raz, 2001), while hippocampal atrophy remains one of the supporting diagnostic features of amnesic Mild Cognitive Impairment (aMCI) and AD (de Flores et al., 2015a). The next challenge is to distinguish normal age-related hippocampal changes from potential pathological changes related to genetic and lifestyle risk factors of dementia in pre-symptomatic individuals (Jack et al., 2013). Overall structural volumes may, however, lack sufficient sensitivity for early detection. Instead, multi-parametric quantitative MRI indices may provide an alternate route to detect subtle microstructural changes that, in turn, aid our understanding of both age- and dementia risk-related effects on the hippocampal formation and its subfields (Kodiweera et al., 2016; Metzler-Baddeley et al., 2019a; Metzler-Baddeley et al., 2019b; Nazeri et al., 2015; Wolf et al., 2015).

The objectives of this study were three-fold: Firstly, to characterize the pattern of age and age-independent dementia risk effects on hippocampal subfield macro- and microstructure in a sample of cognitively healthy adults (38-71 years of age) (Metzler-Baddeley et al., 2019a; Metzler-Baddeley et al., 2019b). The effects of three established risk factors of dementia, i.e., carriage of the Apolipoprotein E (*APOE*)  $\epsilon$ 4 genotype (Angelopoulou et al., 2021; Chai et al., 2021; Feringa and van der Kant, 2021; Koutsodendris et al., 2021; Liu et al., 2013), a positive family history (FH) of dementia in a first-grade relative (Alosco et al., 2014; Donix et al., 2010; Johnson et al., 2014; Tanzi, 2012; Wolf, 2012), and abdominal obesity (Arnoldussen et al., 2014; Beydoun et al., 2008; Chuang

et al., 2016; Pedditizi et al., 2016; Xu et al., 2011) and their potential interactions were studied (Metzler-Baddeley et al., 2019a; Metzler-Baddeley et al., 2019b; Mole et al., 2020).

Secondly, to investigate the pattern of age and risk effects not only with volumetric but also with multi-parametric microstructural MRI from diffusion neurite density and dispersion imaging (NODDI) (Zhang et al., 2012) and quantitative magnetization transfer (qMT) (Eng et al., 1991; Henkelman et al., 1993; Henkelman et al., 2001; Sled, 2017) to aid our understanding of the biophysical properties underpinning aging and risk (Wolf et al., 2015). We also assessed whether the choice of protocol for the labelling of hippocampal subfields had an impact on the analysis of risk effects (Yushkevich et al., 2015a). For this purpose, the main subfields of the hippocampal formation, i.e., CA1, CA2/3, dentate gyrus (DG) and subiculum were segmented with two publicly available, automated protocols that make use of T<sub>1</sub>- and T<sub>2</sub>-weighted hippocampal images: The Bayesian inference labeling methods implemented in FreeSurfer 6.0 (Iglesias et al., 2015) and the Automatic Segmentation of Hippocampal Subfields (ASHS) that utilizes multi-atlas segmentation and machine learning techniques (Yushkevich et al., 2015b). Both protocols have recently been validated with histopathological evidence in patients with epilepsy (Menzler et al., 2021; Mizutani et al., 2021).

Thirdly, to explore whether individual differences in hippocampal subfield macro- and microstructure correlated with episodic memory and spatial navigation abilities known to rely on hippocampal processes (Brown et al., 2014; Hartley et al., 2005; Hoang et al., 2018; Kyle et al., 2015).

The evidence regarding age-related atrophy in hippocampal subfields remains mixed. Volume reductions have previously been reported for CA1 (Malykhin et al., 2017; Mueller and Weiner, 2009; Raz et al., 2015; Uribe et al., 2018; Wisse et al., 2014), CA2-4 (Daugherty et al., 2016; Malykhin et al., 2017; Mueller and Weiner, 2009; Raz et al., 2015; Wisse et al., 2014), subiculum (de Flores et al., 2015b; La Joie et al., 2010; Malykhin et al., 2017; Wolf et al., 2015) and DG (de Flores et al., 2015b; La Joie et al., 2010) but were not consistently observed across all studies. A recent UK Biobank data analysis found non-

linear age-related changes in all subfields of the hippocampal formation (Veldsman et al., 2021). In this study, female *APOE*  $\epsilon 4$  homozygotes over the age of 65 years exhibited the largest atrophy across CA1, CA3, CA4, subiculum and presubiculum, suggesting that age and sex modulated the effects of *APOE* (Veldsman et al., 2021) (see also Donix et al., 2010; Dounavi et al., 2020; Kerchner et al., 2014; Mueller et al., 2008; Mueller and Weiner, 2009; Reiter et al., 2017). *APOE*  $\epsilon 4$ -related volume reductions in the molecular layer of the subiculum and the CA fields were also observed in a middle-aged cohort of cognitively healthy participants, while no effects were present for FH or cardiovascular risk (Dounavi et al., 2020) (Donix et al., 2010; Dounavi et al., 2020; Kerchner et al., 2014; Mueller et al., 2008; Mueller and Weiner, 2009; Reiter et al., 2017).

Furthermore, lifestyle-related factors, such as obesity and sedentary lifestyle, may have adverse effects on the hippocampus. For instance, abdominal visceral fat has been found to be associated with volume reductions (Anan et al., 2010) and increases in free water signal of the whole hippocampal formation (Metzler-Baddeley et al., 2019a). Obesity is related to pro-inflammatory states (Cox et al., 2015) and in rodent models was found to induce microglia activation and reduce long-term potentiation in the hippocampus (Hao et al., 2016). It is increasingly recognized that *APOE*  $\epsilon 4$  may interact with obesity to augment disruptions in lipid, glucose, insulin, and immune response metabolism which in turn may increase AD risk (Jones and Rebeck, 2018; Mole et al., 2020; Zade et al., 2013). Consistent with this view, we have previously found interaction effects between *APOE*, FH, and obesity on white matter microstructure, that were particularly pronounced in the right parahippocampal cingulum (Mole et al., 2020). More specifically, *APOE*  $\epsilon 4$  carriers with a positive FH exhibited obesity-related reductions in apparent myelin, while no effects were observed for those without a FH. These risk-effects were moderated by hypertension and inflammation-related blood markers. The parahippocampal cingulum is a limbic white matter pathway that connects the posterior cingulate and parietal cortices with the medial temporal lobes (Bubb et al., 2018) and is known to be affected in amnesic Mild Cognitive Impairment (Metzler-Baddeley et al., 2012; Yu et al., 2017). It is therefore possible that adverse interactions

between genetic and lifestyle risk factors may increase the vulnerability of medial temporal lobe structures to neurodegeneration. However, the nature of these interactions and their impact on the subfields of the hippocampal formation remain poorly understood and require further elucidation.

To this purpose we studied MRI data from 158 asymptomatic individuals from the Cardiff Aging and Risk of Dementia Study (CARDS) (38-71 years of age) (Coad et al., 2020; Metzler-Baddeley et al., 2019a; Metzler-Baddeley et al., 2019b; Mole et al., 2020), a sample well-characterized with regards to their genetic and lifestyle risk of dementia (Mole et al., 2020). MRI measures consisted of intracranial volume (ICV) adjusted hippocampal subfield volumes and the following microstructural indices: i) NODDI intracellular signal fraction (ICSF) for apparent neurite density, ii) NODDI isotropic signal fraction (ISOSF) estimating free water, iii) NODDI neurite orientation dispersion index (ODI), iv) qMT macromolecular proton fraction (MPF) for apparent myelin (Ceckler et al., 1992; Schmierer et al., 2007), v) qMT forward exchange rate  $k_f$  estimating tissue metabolism (Giulietti et al., 2012; Harrison et al., 2015) and vi) longitudinal relaxation rate  $R_1$  for apparent water, lipid/protein, and, to a lesser extent, iron content (Callaghan et al., 2015).

Support for studying neurite properties comes from neuropathological evidence suggesting that human aging is associated with a reduction of neocortical dendritic spine density (Dickstein et al., 2013) with accompanying compensatory increases in the dendritic extent of DG granular cells (Flood et al., 1985; Flood et al., 1987). Likewise, recent *in vivo* NODDI studies found age-related reductions in neocortical neurite dispersion (Nazeri et al., 2015) and increases in neurite dispersion of the whole hippocampus (Metzler-Baddeley et al., 2019b; Nazeri et al., 2015). With regards to AD pathology, ODI and ICSF were found sensitive to amyloid and tau pathology in the hippocampus (Colon-Perez et al., 2019) and in white matter in AD animal models (Colgan et al., 2016; Colon-Perez et al., 2019). In addition, qMT  $k_f$  reductions were reported in the hippocampus, temporal lobes, parietal cortex and posterior cingulate in people with AD (Giulietti et al., 2012) and  $T_1$  and  $T_2$  relaxometry measurements have been found sensitive to AD pathology in animal and human

imaging studies (Knight et al., 2016; Knight et al., 2019; Tang et al., 2018). In previous CARDS analyses, we observed age-related reductions in left hippocampus  $k_f$  and  $R_1$  (Metzler-Baddeley et al., 2019b) as well as *APOE*  $\epsilon 4$ -related reductions in left thalamus qMT MPF (Mole et al., 2020). These observations demonstrate that microstructural MRI indices may provide complementary information to volumetric measurements capturing age and risk-related differences in metabolic, macromolecular, and free water-related tissue properties (Callaghan et al., 2015; Giulietti et al., 2012; Harrison et al., 2015).

It should be noted though that our previous CARDS analyses did not find risk effects on microstructural measurements of the whole hippocampal formation (Mole et al., 2020; see also Dounavi et al., 2020, Evans et al., 2020). An important limitation of these studies was the treatment of the hippocampal formation as a unitary structure, while this region comprises multiple subfields that are thought to be differentially vulnerable to age and disease-related processes. Notably the subiculum and CA1 regions have been proposed to be particularly vulnerable in aMCI and AD (Adler et al., 2018; Khan, et al., 2015; Lindberg et al., 2017) and in asymptomatic individuals with positive amyloid and tau cerebrospinal fluid (CSF) biomarkers (Tardif et al., 2018).

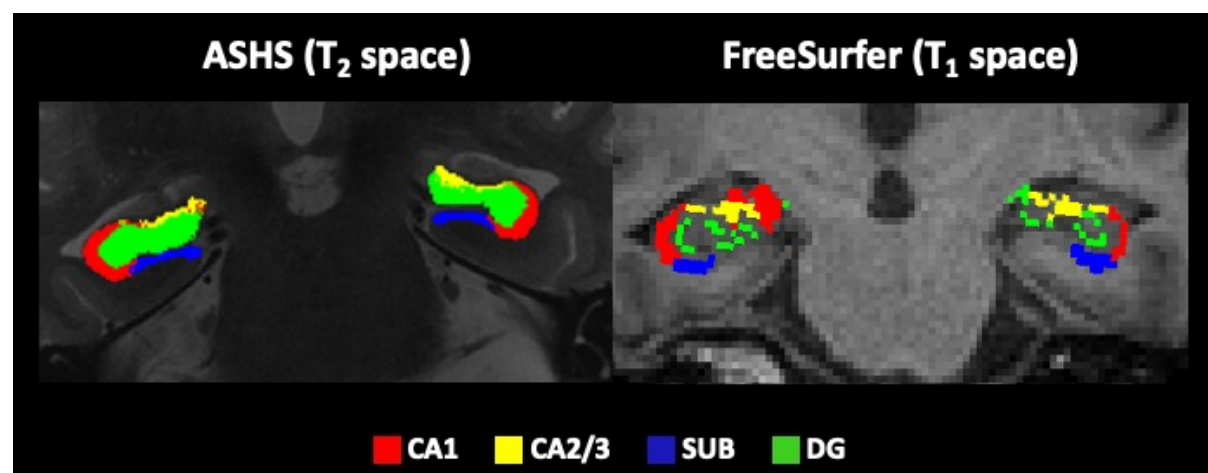

Figure 1 displays the hippocampal subfield regions that were automatically segmented from T<sub>1</sub> and T<sub>2</sub>-weighted images using the Automated Segmentation of Hippocampal Subfields (ASHS) (Yushkevich et al., 2015b) and the FreeSurfer Segmentation of Hippocampal



Subfields functionality (version 6) (Iglesias et al., 2015). Segmentations are shown for one participant with coronal images along the anterior-posterior hippocampal axis on a T<sub>2</sub>-weighted image for ASHS and a T<sub>1</sub>-weighted image for FreeSurfer. Abbreviations: cornu Ammonis 1 (CA1), CA2/3, subiculum (SUB) and dentate gyrus (DG).

However, one source of inconsistency when subdividing the hippocampal formation stems from different subfield and border segmentation protocols (Yushkevich et al., 2015a). Yushkevich et al. (2015a) compared 21 protocols for labelling hippocampal subfields, including those adopted here (ASHS and FreeSurfer). They found considerable differences with regards to the region within each segmentation was performed, the set of the employed anatomical labels, and the extents of specific anatomical labels. The largest discrepancies between the protocols were at the CA1/subiculum boundary and in the anterior portion relative to body and tail portions of the hippocampal formation.

For this reason, we employed the two most widely used automated hippocampal subfield labelling protocols, i.e., FreeSurfer version 6.0 and ASHS. We then assessed whether the type of protocol affected the pattern of risk-related differences in macro- and microstructure of the hippocampal formation. We focused our comparison on CA1, CA2/3, DG and subiculum as these regions have previously been implicated in aging and disease and were sufficiently large to extract meaningful microstructural information from diffusion and qMT images with a resolution of approximately 2mm<sup>3</sup>.

While the microstructural measurements described above were chosen to capture complementary tissue properties (Wolf et al., 2015), they also share some overlapping information which can cause redundancies in the data analysis and reduce the statistical power of the analyses (Chamberland et al., 2019). We and others have previously demonstrated that Principal Component Analysis (PCA) can be successfully employed to reduce the dimensionality of multi-modal brain measurements and extract meaningful components of the underlying data structure (Bourbon-Teles et al., 2017; Chamberland et al., 2019; Geeraert et al., 2020; Metzler-Baddeley et al., 2017; Penke et al., 2010).

Here we adopted this approach to study potential dissociations between age- and age-independent risk effects on principal components of hippocampal macro- and microstructure. More specifically, we modelled main and interaction effects of *APOE*, FH, WHR, protocol and hippocampal subfields on three principal components that reflected apparent myelin/neurite packaging, size/complexity and metabolism of hippocampal gray matter. These analyses controlled for the effects of age, sex (Veldsman et al., 2021) and verbal intelligence (Boyle et al., 2021), as we aimed to gain a better understanding of age and sex-independent effects of *APOE*, FH and obesity and their potential interactions. Finally, we assessed age and risk effects on cognitive components of episodic memory and spatial navigation and explored brain-function correlations between the hippocampal subfield macro- and microstructure and cognition.

## 2. Materials and Methods

CARDS received ethical approval from the School of Psychology Research Ethics Committee at Cardiff University (EC.14.09.09.3843R2). Participants provided written informed consent in accordance with the Declaration of Helsinki.

### 2.1 Participants

Participants between the age of 38 and 71 years were recruited from the local community *via* Cardiff University volunteer panels, notice boards and local poster advertisements. A detailed description of the CARDS sample can be found in Mole et al. (2020). All participants had a good command of the English language and were without a history of neurological and/or psychiatric disease, head injury with loss of consciousness, or drug or alcohol dependency. A total of 166 CARDS volunteers underwent MRI scanning at the Cardiff University Brain Research Imaging Centre (CUBRIC). Seven participants did not complete the MRI protocol, including the high resolution T<sub>2</sub> images of the hippocampus, due to claustrophobia and/or feeling uncomfortable. Participants' intellectual function was assessed with the National Adult Reading Test - Revised (NART-R) (Nelson, 1991) and

cognitive impairment was screened for with the Mini Mental State Exam (MMSE) (Folstein et al., 1975). One person with a MMSE score of 26 was excluded from the analysis. Thus, the current analysis was based on 158 datasets (see Table 1).

*Table 1.* Summary of demographic, genetic, and lifestyle risk information of participants.

|                              |                       |
|------------------------------|-----------------------|
| n                            | 158                   |
| Age (in years)               | $M = 55.7, SD = 8.2$  |
| Females n                    | 91                    |
| NART                         | $M = 116.9, SD = 6.7$ |
| MMSE                         | $M = 29.1, SD = 0.9$  |
| FH+ n                        | 56                    |
| <i>APOE</i> $\epsilon 4$ + n | 61                    |
| Central obesity* n           | 95                    |

\*Based on waist-hip ratio  $\geq 0.9$  for males and  $\geq 0.85$  for females (Organisation, 2008). *APOE* = Apolipoprotein-E, FH = Family History of a dementia, M = Mean, MMSE = Mini Mental State Exam (Folstein et al., 1975), NART = National Adult Reading Test (Nelson, 1991), SD = Standard Deviation.

## 2.2 Assessment of dementia risk factors

Central obesity was assessed with the Waist to Hip Ratio (WHR) following the World Health Organisation's (Organisation, 2008) recommended protocol for measuring waist and hip circumference. Central obesity was defined as a WHR  $\geq 0.9$  for males and  $\geq 0.85$  for females. Individuals were categorized as centrally obese (WHR+) or normal WHR (WHR-).

Saliva samples were collected with the Genotek Oragene-DNA kit (OG-500) for DNA extraction and *APOE* genotyping. *APOE* genotypes  $\epsilon 2$ ,  $\epsilon 3$ , and  $\epsilon 4$  were determined by TaqMan genotyping of single nucleotide polymorphism (SNP) rs7412 and KASP genotyping of SNP rs429358. Genotyping was unsuccessful for one individual. Participants were categorized into those who carried at least one  $\epsilon 4$  allele (*APOE*  $\epsilon 4$ ) and those who did not (*APOE*  $\epsilon 4$ -).

Participants also self-reported their family history of dementia, i.e., whether a first-grade relative was affected by Alzheimer's disease, vascular dementia or any other type of dementia. Two participants could not provide information about their family history (FH). The remaining participants were categorized into those with a positive FH (FH+) and those without (FH-).

### *2.3 Cognitive assessment*

Immediate and 30 minutes delayed verbal and visual recall were assessed with the Rey Auditory Verbal Learning Test (RAVLT) (Rey, 1941; Schmidt, 1996) and the complex Rey figure Test (Rey, 1941). Short term topographical memory was measured with the Four Mountains Test (Chan et al., 2016). Spatial navigation was assessed with a virtual Morris Water Maze Task (Hamilton et al., 2002) where participants had to find and navigate to a hidden platform in a water pool. This task also included a motor control condition without a visible platform. Working memory capacity and executive functions were assessed with computerized tests from the Cambridge Brain Sciences battery (Hampshire et al., 2012; Owen et al., 2010). Working memory capacity was tested with digit and spatial span, distractor suppression with an adapted version of the Stroop test (Double-Trouble), problem solving with a version of the Tower of London task (the Tree task), abstract reasoning with grammatical reasoning and the odd-one-out task, as well as the ability to manipulate and organize spatial information with a self-ordered spatial span task. In addition, participants performed a paired-associate learning (PAL) and a choice-reaction time (CRT) task. Cognitive outcome measures were the number and latencies of correct responses as well as spatial navigation path length.

### *2.4 MRI data acquisition*

MRI data were acquired on a 3T MAGNETOM Prisma clinical scanner (Siemens Healthcare, Erlangen, Germany). For hippocampal subfield segmentation and volumetric analyses, T<sub>1</sub>- and T<sub>2</sub>-weighted anatomical images were collected. T<sub>1</sub>-weighted images were

acquired with a three-dimension (3D) magnetization-prepared rapid gradient-echo (MP-RAGE) sequence (256 x 256 acquisition matrix, TR = 2300 ms, TE = 3.06 ms, TI = 850ms, flip angle  $\theta = 9^\circ$ , 176 slices, 1mm slice thickness, FOV = 256 mm and acquisition time of ~ 6 min). High resolution (0.4 x 0.4 x 2.5 mm voxel) T<sub>2</sub>-weighted anatomical images of the hippocampus were acquired with a turbo-spin-echo sequence in the coronal plane with TR = 3300 msec, TE = 84 msec, TI =, flip angle = 155°, 30 slices, 2.5mm slice thickness, FOV = 256 mm and acquisition time of ~ 8 min.

High Angular Resolution Diffusion Imaging (HARDI) (Tuch et al., 2002) data (2 x 2 x 2 mm voxel) for the NODDI analyses were collected with a spin-echo echo-planar dual shell HARDI sequence with diffusion encoded along 90 isotropically distributed orientations (Jones et al., 1999) (30 directions at b-value = 1200 s/mm<sup>2</sup> and 60 directions at b-value = 2400 s/mm<sup>2</sup>) and six non-diffusion weighted scans with dynamic field correction and the following parameters: TR = 9400ms, TE = 67ms, 80 slices, 2 mm slice thickness, FOV = 256 x 256 x 160 mm, GRAPPA acceleration factor = 2 and acquisition time of ~15 min.

Quantitative magnetization transfer weighted imaging (qMT) data were acquired with an optimized 3D MT-weighted gradient-recalled-echo sequence (Cercignani and Alexander, 2006) to obtain magnetization transfer-weighted data with the following parameters: TR = 32 ms, TE = 2.46 ms; Gaussian MT pulses, duration t = 12.8 ms; FA = 5°; FOV = 24 cm, 2.5 x 2.5 x 2.5 mm<sup>3</sup> resolution. The following off-resonance irradiation frequencies ( $\Theta$ ) and their corresponding saturation pulse nominal flip angles ( $\Delta$ SAT) for the 11 MT-weighted images were optimized using Cramer-Rao lower bound optimization:  $\Theta$  = [1000 Hz, 1000 Hz, 2750 Hz, 2768 Hz, 2790 Hz, 2890 Hz, 1000 Hz, 1000 Hz, 12060 Hz, 47180 Hz, 56360 Hz] and their corresponding  $\Delta$ SAT values = [332°, 333°, 628°, 628°, 628°, 628°, 628°, 628°, 628°, 628°, 332°]. The longitudinal relaxation time, T<sub>1</sub>, of the system was estimated by acquiring three 3D gradient recalled echo sequence (GRE) volumes with three different flip angles ( $\theta = 3^\circ, 7^\circ, 15^\circ$ ) using the same acquisition parameters as used in the MT-weighted sequence (TR = 32 ms, TE = 2.46 ms, FOV = 24 cm, 2.5 x 2.5 x 2.5 mm<sup>3</sup> resolution). Data for computing the static magnetic field (B<sub>0</sub>) were collected using two 3D GRE volumes with different echo-

times (TE = 4.92 ms and 7.38 ms respectively; TR= 330ms; FOV= 240 mm; slice thickness 2.5 mm) (Jezzard and Balaban, 1995).

## 2.5 Hippocampal subfield segmentations

Whole brain T<sub>1</sub> and high resolution T<sub>2</sub>- weighted images were used as input images to segment subregions of the hippocampal formation with the FreeSurfer (version 6.0) (Iglesias et al., 2015) (Figure 1) and ASHS (Yushkevich et al., 2015b) hippocampal subfields segmentation tools. Detailed descriptions of the two pipelines are available on <https://surfer.nmr.mgh.harvard.edu/fswiki/HippocampalSubfields> and <https://www.nitrc.org/projects/ashs>.

In brief, the FreeSurfer version 6.0 cross-sectional segmentation pipeline firstly requires the fully automated analysis of the T<sub>1</sub>-weighted images with reconall (<http://surfer.nmr.mgh.harvard.edu/>) that involves skull stripping, correction for motion artefacts and field inhomogeneities, the registration of native data to and from the standard Talairach space, parcellation of cortical regions and the segmentation of subcortical structures including the hippocampi (Fischl, 2012). These processing steps were followed by a hippocampal subfield segmentation pipeline that utilises both T<sub>1</sub> and T<sub>2</sub>- weighted images to identify anatomical landmarks for the bilateral segmentation of 12 subfields, i.e., CA1, CA2/3, CA4, subiculum, presubiculum, parasubiculum, molecular layer of the subiculum and CA fields, granule cell layer of the dentate gyrus, fimbria, hippocampus-amygdala transition area, hippocampal tail, and fissure (Iglesias et al., 2015). This pipeline is based on a statistical atlas of the hippocampus constructed from manual segmentation labels from both *in vivo* and high-resolution *ex vivo* data that were used to develop a Bayesian inference algorithm for the automatic segmentation of the hippocampus proper from T<sub>1</sub> and T<sub>2</sub>- weighted structural images (Iglesias et al., 2015).

The ASHS software (<https://sites.google.com/site/hipposubfields>) implements a multi-atlas segmentation technique that involves registering the target MRI with a bank of T<sub>2</sub>- weighted atlas MRIs including manually labeled subregions. Here the ASHS UPenn PMC

Atlas package was chosen for this purpose. Multi-atlas label fusion is then applied to select a consensus segmentation based on the shared similarity between target and atlas images. Systematic segmentation errors are minimized with a learning-based bias correction technique. Joint label fusion and corrective learning are then repeated by bootstrapping seeded by the segmentation results from the previous phase. ASHS leads to the segmentation of 10 region of interests, i.e., CA1, CA2, CA3, DG, subiculum, entorhinal cortex, Brodmann area 35, Brodmann area 36, collateral sulcus and miscellaneous regions. To allow meaningful extraction of lower resolution microstructural data, ASHS CA2 and CA3 regions were combined using the fsmaths utility from the Oxford Centre for Functional MRI of the Brain (FMRIB) Software Library (version 6.0) (Jenkinson et al., 2012) .

For the purpose of comparing between the two segmentation techniques and for allowing meaningful extraction of lower resolution microstructural values, the present analysis focused on CA1, CA2/3, dentate gyrus and subiculum regions that were shown to be affected by aging and AD (de Flores et al., 2015a).

Mean hippocampal subfield and intracranial volumes (ICV) were extracted for each brain. Subfield volumes were then adjusted for ICV to correct for inter-individual differences in head size using the formula (subfield volume x 1000)/ ICV (from FreeSurfer or ASHS respectively).

## 2.6 HARDI and qMT data processing

A detailed description of the microstructural data processing has been provided (Metzler-Baddeley et al., 2019a; Metzler-Baddeley et al., 2019b). In brief, the dual-shell HARDI data were split and  $b = 1200$  and  $2400 \text{ s/mm}^2$  data were corrected separately for distortions induced by the diffusion-weighted gradients and motion artifacts with appropriate reorientation of the encoding vectors (Leemans and Jones, 2009) in ExploreDTI (Version 4.8.3) (Leemans A et al., 2009). EPI-induced geometrical distortions were corrected by warping the diffusion-weighted image volumes to the  $T_1$ -weighted anatomical images (Irfanoglu et al., 2012). After preprocessing, the NODDI model (Zhang et al., 2012) was fitted

to the HARDI data with the fast, linear model fitting algorithms of the Accelerated Microstructure Imaging via Convex Optimization (AMICO) framework (Daducci et al., 2015) to gain ISOSF, ICSF, and ODI maps.

Using Elastix (Klein et al., 2010), MT-weighted GRE volumes were co-registered to the MT-volume with the most contrast using a rigid body (6 degrees of freedom) registration to correct for inter-scan motion. Data from the 11 MT-weighted GRE images and  $T_1$ -maps were fitted by a two-pool model using the Ramani pulsed-MT approximation (Ramani et al., 2002). This approximation provided MPF and  $k_f$  maps. MPF maps were thresholded to an upper intensity limit of 0.3 and  $k_f$  maps to an upper limit of 3.0 using the FMRIB's fslmaths imaging calculator to remove voxels with noise-only data.

All microstructural maps were spatially aligned with the hippocampal subfield masks by co-registration with the  $T_1$ -weighted anatomical space as reference image with linear affine registration (12 degrees of freedom) using FMRIB's Linear Image Registration Tool (FLIRT). Spatial alignment of microstructural maps to ASHS hippocampal subfield masks involved an additional warping to the  $T_2$ -weighted space with FLIRT.

## 2.7 Statistical analysis

Statistical analyses were conducted in SPSS version 26 (IBM, 2011). All data were examined for normal distribution and for outliers, defined as above or below three times the interquartile range (75th percentile value - 25th percentile value).

*Missing data:* FreeSurfer hippocampal subfield segmentations could be performed for all 158 datasets and ASHS segmentations for a total of 153 datasets. For FreeSurfer one volume and for ASHS two volume measurements were excluded as outliers. For the microstructural data, 1% of the data were excluded as outliers for FreeSurfer and 5% for ASHS segmentations.

For the principal component analysis (PCA), each participant's volumetric and microstructural data for the 16 hippocampal subfield segmentations [2 (FreeSurfer, ASHS) x 2 (left, right) x 4 (CA1, CA2/3, DG, subiculum)] were concatenated to form  $n = 2528$



observations. The dependent variables were represented by the seven brain measurements (ICV-adjusted volumes, MPF,  $k_r$ ,  $R_1$ , ODI, ISOSF, ICSF). Bartlett's test of sphericity and the Kaiser-Meyer-Olkin (KMO) test were used to check that the data were suitable for PCA [KMO = 0.57,  $\chi^2(21) = 2842.2$ ,  $p < 0.001$ ]. PCA was then carried out using a procedure with orthogonal Varimax rotation of the component matrix. Components were extracted based on the Kaiser criterion of including all components with an eigenvalue  $> 1$  (IBM, 2011), by inspecting Cattell's scree plots (Cattell, 1952) and by assessing each component with regards to their interpretability. Component loadings that exceeded a value of 0.5 were considered as significant. The dimensionality of the cognitive data for all 158 participants was also reduced with PCA using the same procedure as described above [KMO = 0.61,  $\chi^2(630) = 2463.37$ ,  $p < 0.001$ ].

Each participant's PCA least squares regression component scores (DiStefano et al., 2009) were subsequently entered as dependent variables in a multivariate analysis of covariance (MANCOVA) that tested for main and interaction effects of the risk factors *APOE* genotype ( $\epsilon 4+$ ,  $\epsilon 4-$ ), FH (FH+, FH-), and WHR (WHR+, WHR-) as well as for the effects of the segmentation protocol (FreeSurfer, ASHS) and hippocampal subfield segmentations (bilateral CA1, CA2/3, DG, subiculum). Age, sex and IQ-scores from the NART-R (Nelson, 1991) were included as covariates. Similarly, MANCOVA tests for risk effects on cognitive component scores, while controlling for age, sex, and IQ, were completed.

Significant omnibus effects were further investigated with post-hoc comparisons using univariate analysis of covariance (ANCOVA) and independent t-tests. Relationships between brain structure and cognitive component scores were studied using hierarchical linear regression models that first entered as independent variables age and sex, and then in a second model volumetric and microstructural measurements of CA1, CA2/3, DG and subiculum in a stepwise fashion to predict the variance in the cognitive component data. To reduce the number of independent variables entered into the regression model and hence model overfit, macro- and microstructural measurements were averaged over protocol and hemisphere for each subfield.

First and post-hoc models were corrected for multiple comparisons with a False Discovery Rate (FDR) of 5% using the Benjamini-Hochberg procedure (Benjamini and Hochberg, 1995). The 5% FDR was applied to all statistical tests that related to the same theoretical inference (Lakens, 2014).

All reported p-values, unless stated otherwise, were Benjamini-Hochberg adjusted ( $p_{BHadj}$ ) and two-tailed. Information about effects sizes was provided with the partial eta squared index  $\eta_p^2$  for MANCOVA analyses and  $R^2$  for regression analyses.

### 3. Results

#### 3.1 Principal Component Analysis (PCA) of brain measurements

PCA extracted three components that explained 67% of the variance in the hippocampal macro- and microstructural data (Table 2). The first component explained 28.2% of the data variance and had positive loadings  $> 0.5$  from MPF,  $R_1$  and ICSF sensitive to myelin and neurite packing. The second component explained an additional 24.5% of the variance and had positive loadings  $> 0.5$  from ODI and ICV-adjusted volumes and a negative loading from ISOSF and thus captured tissue size and complexity. The third component explained 14.3% of variance and had a high loading from  $k_f$ , that may reflect tissue metabolism.

*Table 2. Rotated Component Matrix of the Principal Component Analysis within the macro- and microstructural data from FreeSurfer and ASHS hippocampal subfields (N = 2528)\*.*

|                        | <b>PC1</b><br><b>Myelin/neurite</b><br><b>packing</b> | <b>PC2</b><br><b>Size/Complexity</b> | <b>PC3</b><br><b>Metabolism</b> |
|------------------------|-------------------------------------------------------|--------------------------------------|---------------------------------|
| ICSF                   | <b>0.62</b>                                           | -0.05                                | -0.02                           |
| ISOSF                  | -0.34                                                 | <b>-0.71</b>                         | -0.10                           |
| ODI                    | -0.21                                                 | <b>0.85</b>                          | 0.01                            |
| MPF                    | <b>0.88</b>                                           | 0.05                                 | 0.003                           |
| R <sub>1</sub>         | <b>0.80</b>                                           | -0.02                                | 0.005                           |
| k <sub>r</sub>         | -0.02                                                 | -0.02                                | <b>0.99</b>                     |
| ICV-adjusted<br>volume | -0.05                                                 | <b>0.70</b>                          | -0.08                           |

\* Rotation Method: Varimax with Kaiser normalization.

### 3.2 Multivariate Analysis of Covariance (MANCOVA) of macro- and microstructural PCs

*Omnibus effects:* There were significant main effects for age [ $F(3,2124) = 13.72$ ,  $p_{\text{BHadj}} < 0.001$ ,  $\eta_p^2 = 0.02$ ], sex [ $F(3,2124) = 22.24$ ,  $p_{\text{BHadj}} < 0.001$ ,  $\eta_p^2 = 0.03$ ], WHR [ $F(3,2124) = 6.8$ ,  $p_{\text{BHadj}} < 0.001$ ,  $\eta_p^2 = 0.01$ ], protocol [ $F(3,2124) = 128.7$ ,  $p_{\text{BHadj}} < 0.001$ ,  $\eta_p^2 = 0.15$ ] and hippocampal subfield [ $F(9,6378) = 322.2$ ,  $p_{\text{BHadj}} < 0.001$ ,  $\eta_p^2 = 0.3$ ]. Significant interaction effects were present between protocol and hippocampal subfield [ $F(9,6378) = 111.29$ ,  $p_{\text{BHadj}} < 0.001$ ,  $\eta_p^2 = 0.14$ ] and between *APOE* and WHR [ $F(3,2124) = 5.51$ ,  $p_{\text{BHadj}} = 0.005$ ,  $\eta_p^2 = 0.008$ ].

*Post hoc effects:* Protocol and hippocampal subfield had significant effects on the myelin/neurite packing PC1 [Protocol:  $F(1,2126) = 21.5$ ,  $p_{\text{BHadj}} < 0.001$ ,  $\eta_p^2 = 0.01$ ; Subfield:  $F(3,2126) = 236.7$ ,  $p_{\text{BHadj}} < 0.001$ ,  $\eta_p^2 = 0.25$ ] and the size/complexity PC2 [Protocol:

$F(1,2126) = 381.7$ ,  $p_{\text{BHadj}} < 0.001$ ,  $\eta_p^2 = 0.15$ ; Subfield:  $F(3,2126) = 1483.2$ ,  $p_{\text{BHadj}} < 0.001$ ,  $\eta_p^2 = 0.68$ ]. Overall ASHS relative to FreeSurfer segmentations had smaller PC1 values [ $t(2248) = -3.9$ ,  $p_{\text{BHadj}} < 0.001$ ] (Figure 2 A) but larger PC2 values [ $t(2248) = 11.2$ ,  $p_{\text{BHadj}} < 0.001$ ] (Figure 2B). With regards to the subfields, subiculum was associated with the largest PC1 myelin/neurite packing values (Figure 2C), while CA2/3 had the lowest PC2 size/complexity values (Figure 2D). No effects were observed for the PC3 Metabolite component.

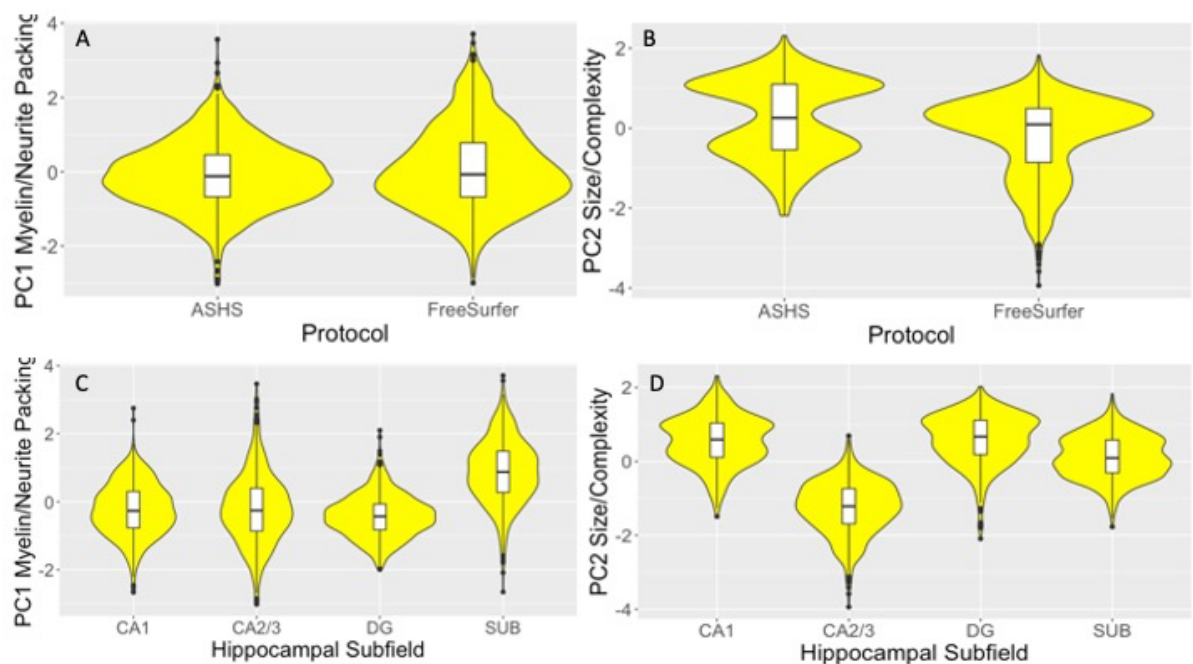

*Figure 2* Violin plots with overlaid box plots of the difference between; A) the Automatic Segmentation of Hippocampal Subfields (ASHS) and the FreeSurfer (version 6) segmentation protocols in the myelin/neurite packing principal component (PC); B) in the size/complexity PC, C) between the hippocampal subfields cornu Ammonis (CA) 1, CA2/3, dentate gyrus (DG) and subiculum in the myelin/neurite packing principal component (PC); D) in the size/complexity PC. Boxplots display the median and the interquartile range and violin plots the kernel probability density, i.e., the width of the yellow area represents the proportion of the data located there.

Furthermore, protocol and subfields interacted with each other in both components [PC1:  $F(3,2126) = 37.1$ ,  $p_{\text{BHadj}} < 0.001$ ,  $\eta_p^2 = 0.05$ ; PC2:  $F(3,2126) = 385.7$ ,  $p_{\text{BHadj}} < 0.001$ ,  $\eta_p^2 = 0.35$ ] (Figure 3). FreeSurfer compared with ASHS segmentations were associated with larger PC1 myelin/neurite packing values, primarily due to larger values in the subiculum (Figure 3A). In contrast, ASHS compared with FreeSurfer segmentations showed larger PC2 size/complexity values (Figure 3B), due to larger estimations in CA1, CA2/3 and DG but not subiculum.

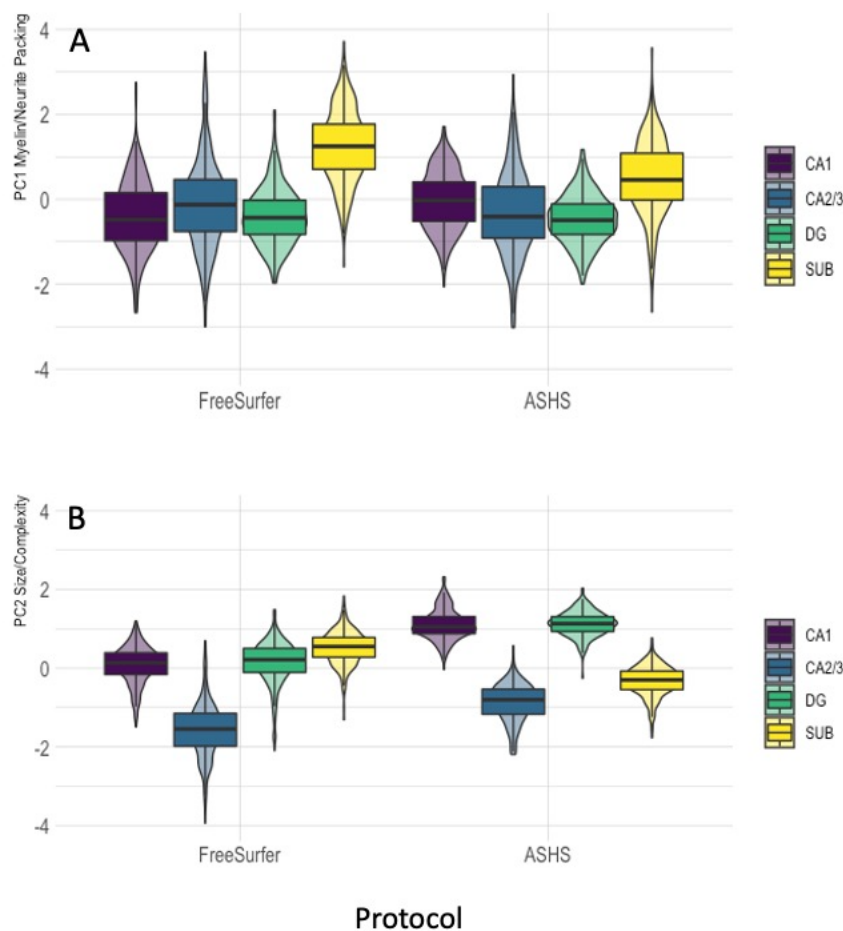

*Figure 3* Violin plots with overlaid box plots displaying the effects of protocol as a function of hippocampal subfields on; A) the myelin/neurite packing principal component; B) the size/complexity component. Boxplots display the median and the interquartile range and

violin plots the kernel probability density. ASHS = Automated Segmentation of Hippocampal Subfields, CA = cornu Ammonis, DG = dentate gyrus, SUB = subiculum.

Age had a significant effect on the myelin/neurite packing PC1 [ $F(1,2126) = 37.3$ ,  $p_{\text{BHadj}} < 0.001$ ,  $\eta_p^2 = 0.02$ ]. More specifically, age was associated with a reversed U-shape in PC1 values having a peak in the forties, with youngest and oldest participants showing the lowest values (Figure 4A). Sex had an effect on the size/complexity PC2 [ $F(1,2126) = 56.3$ ,  $p_{\text{BHadj}} < 0.001$ ,  $\eta_p^2 = 0.03$ ], with males showing reduced PC2 values compared with females [ $t(2279) = 5.3$ ,  $p_{\text{BHadj}} < 0.001$ ] (Figure 4B).

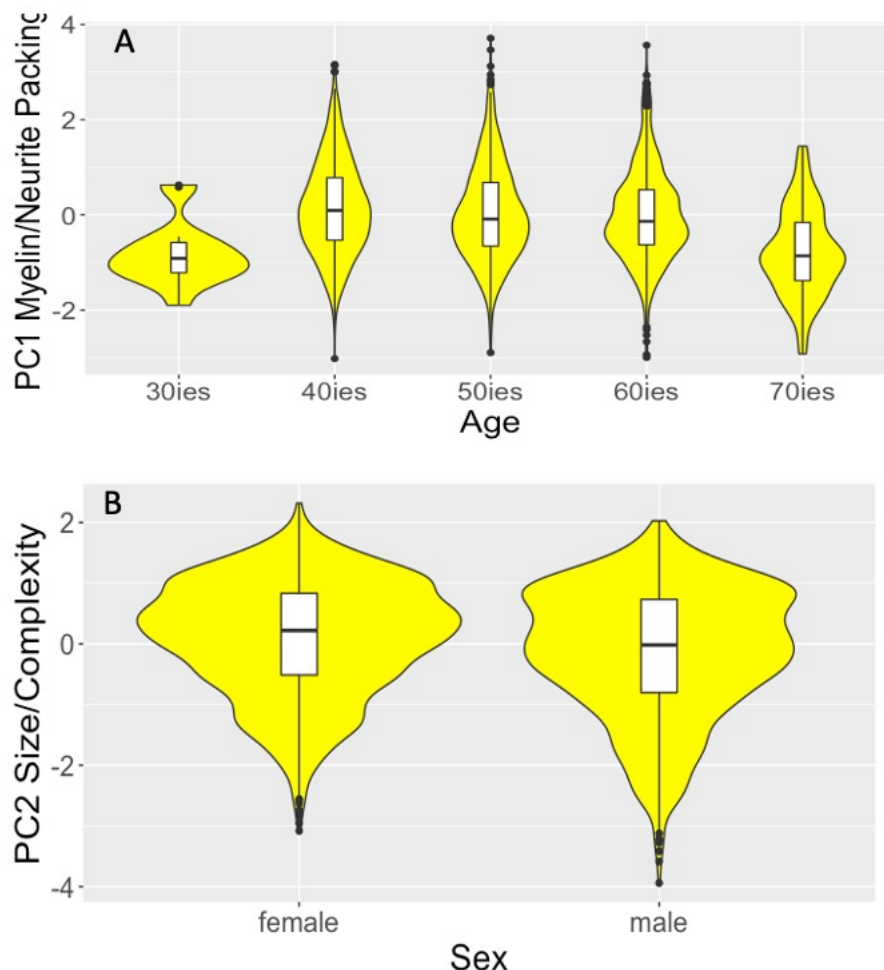

Figure 4 Violin plots with overlaid box plots displaying the effects of A) age on the myelin/neurite packing principal component (PC) and B) of sex on the size/complexity PC.

Boxplots display the median and the interquartile range and violin plots the kernel probability density.

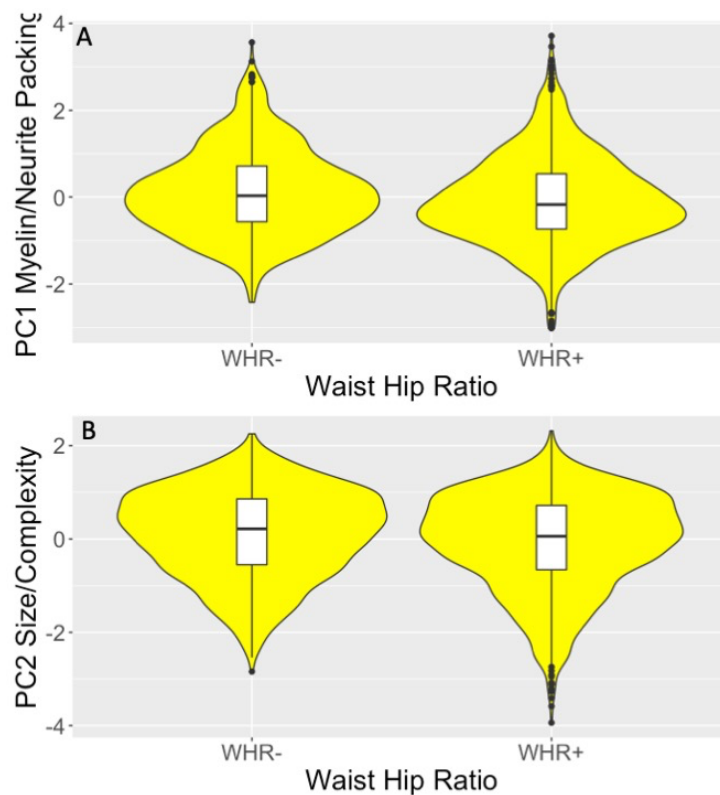

*Figure 5* Violin plots with overlaid box plots displaying the effects of Waist-Hip-Ratio (WHR); A) the myelin/neurite packing principal component (PC); B) the size/complexity PC. Boxplots display the median and the interquartile range and violin plots the kernel probability density.

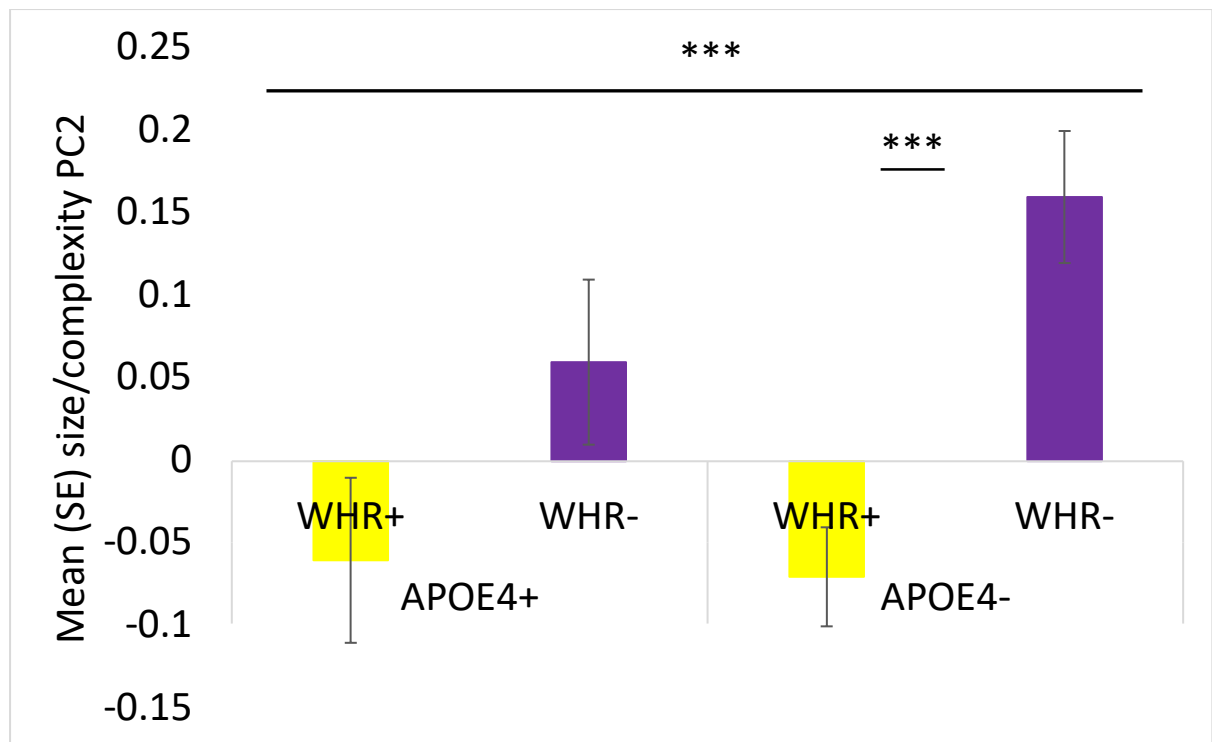

Figure 6 Column figure displaying the mean and standard errors of the size/complexity principal component (PC) as a function of Apolipoprotein E (*APOE*) genotype and Waist-Hip-Ratio (WHR). *APOE*4+ = *APOE*  $\epsilon$ 4- carriers, *APOE*4- = *APOE*  $\epsilon$ 4- non-carriers; WHR+ = individuals with WHR in abdominal overweight/obese range; WHR- = individuals with WHR in healthy range. \*\*\*  $p_{BHadj} < 0.001$

WHR affected myelin/neurite packing and size/complexity components [PC1:  $F(1,2126) = 11.6$ ,  $p_{BHadj} = 0.002$ ,  $\eta_p^2 = 0.005$ ; PC2:  $F(1,2126) = 5.5$ ,  $p_{BHadj} = 0.036$ ,  $\eta_p^2 = 0.003$ ] as centrally obese individuals relative to those with a normal WHR had lower values in both components [PC1:  $t(2231) = 4.14$ ,  $p_{BHadj} < 0.001$ ; PC2:  $t(2231) = 4.15$ ,  $p_{BHadj} < 0.001$ ] (Figure 5). Moreover, WHR interacted with *APOE* on size/complexity [ $F(1,2126) = 15.2$ ,  $p_{BHadj} < 0.001$ ,  $\eta_p^2 = 0.007$ ] (Figure 6). Whilst *APOE*  $\epsilon$ 4- individuals exhibited obesity-related size/complexity reductions [ $t(1341) = 4.14$ ,  $p_{BHadj} < 0.001$ ], this was not the case for *APOE*  $\epsilon$ 4+ individuals [ $t(880) = 1.6$ ,  $p = 0.1$ ] (Figure 6).



### 3.3 Exploring the pattern of age and risk effects across hippocampal subfields

To explore the patterns of age and risk effects across the four hippocampal subfields CA1, CA2/3, DG, and subiculum, separate ANCOVAs were carried out on the PC data for each subfield concatenated across hemisphere and protocol.

Significant age effects (controlled for sex and NART-R IQ) on the myelin/neurite packing PC1 were observed for CA1 [ $F(4,564) = 12.9$ ,  $p_{\text{BHadj}} < 0.001$ ,  $\eta_p^2 = 0.08$ ], for CA2/3 [ $F(4,567) = 5.7$ ,  $p_{\text{BHadj}} < 0.001$ ,  $\eta_p^2 = 0.04$ ], for DG [ $F(4,556) = 7.4$ ,  $p_{\text{BHadj}} < 0.001$ ,  $\eta_p^2 = 0.05$ ] and subiculum [ $F(4,568) = 11.7$ ,  $p_{\text{BHadj}} < 0.001$ ,  $\eta_p^2 = 0.08$ ].

Trends for WHR effects (controlled for age, sex and NART-R IQ) on the size/complexity PC2 were present in CA1 ( $p_{\text{BHadj}} = 0.06$ ), CA2/3 ( $p_{\text{BHadj}} = 0.06$ ) and DG ( $p_{\text{BHadj}} = 0.09$ ) but not for the subiculum ( $p = 0.6$ ). Trends for interaction effects between *APOE* and WHR were present for CA1 ( $p = 0.06$ ) and DG ( $p = 0.06$ ) but not for CA2/3 ( $p = 0.32$ ) or subiculum ( $p = 0.6$ ).

### 3.4 PCA of the cognitive data

Four principal components were extracted that explained together 44% of the variance in the cognitive data (Table 3). The first PC explained 15.2% of the variance and had high loadings  $> 0.5$  from all RAVLT measures and hence reflected verbal recall performance. The second PC explained 13.5% of the variance with loadings from first move latencies in the virtual spatial navigation task. The third PC explained an additional 9.5% of the variance with loadings from spatial navigation path length. The fourth PC explained 5.8% of data variance and had loadings from immediate and delayed recall of the Rey figure, hence reflecting visual recall abilities.

Table 3. Rotated component matrix of the principal component analysis of the cognitive performance <sup>a</sup>

| Cognitive Tests                 | Components       |                                     |                                      |                  |
|---------------------------------|------------------|-------------------------------------|--------------------------------------|------------------|
|                                 | Verbal<br>Memory | Spatial<br>Navigation<br>First Move | Spatial<br>Navigation<br>Path Length | Visual<br>Memory |
| RAVLT List A 1 <sup>st</sup> IR | <b>0.78</b>      | 0.01                                | -0.02                                | 0.06             |
| RAVLT List A 2nd IR             | <b>0.85</b>      | 0.02                                | -0.03                                | 0.01             |
| RAVLT List A 3rd IR             | <b>0.84</b>      | 0.09                                | -0.01                                | -0.03            |
| RAVLT List A 4th IR             | <b>0.81</b>      | 0.02                                | -0.05                                | -0.17            |
| RAVLT List A 5th IR             | <b>0.75</b>      | 0.03                                | -0.01                                | -0.08            |
| RAVLT List B 1 <sup>st</sup> IR | <b>0.47</b>      | -0.25                               | -0.06                                | 0.06             |
| RAVLT List A 6th RaD            | <b>0.81</b>      | -0.02                               | 0.07                                 | 0.13             |
| RAVLT List A DR                 | <b>0.81</b>      | 0.01                                | 0.02                                 | 0.14             |
| Four Mountains Test             | 0.23             | -0.10                               | -0.23                                | <b>0.50</b>      |
| Rey Copy                        | 0.13             | -0.13                               | 0.06                                 | 0.43             |
| Rey Figure IR                   | -0.02            | -0.09                               | -0.02                                | <b>0.80</b>      |
| Rey Figure DR                   | 0.02             | -0.03                               | -0.04                                | <b>0.85</b>      |
| Digit Span                      | 0.13             | -0.27                               | -0.09                                | 0.001            |
| Spatial Span                    | -0.14            | -0.06                               | -0.23                                | 0.30             |
| Double Trouble                  | -0.01            | -0.16                               | -0.21                                | 0.19             |
| Tree Task                       | 0.07             | -0.04                               | -0.09                                | -0.21            |
| Odd one out                     | -0.07            | -0.16                               | -0.02                                | -0.03            |
| Paired Associate Learning       | 0.09             | -0.11                               | -0.25                                | -0.20            |
| Self-ordered search             | -0.28            | 0.02                                | -0.11                                | -0.07            |
| Grammatical Reasoning           | 0.01             | -0.29                               | -0.02                                | 0.06             |
| Choice Reaction Time            | -0.01            | 0.41                                | 0.15                                 | -0.34            |
| Spatial Navigation:             |                  |                                     |                                      |                  |
| FM Block 2                      | 0.35             | <b>0.75</b>                         | -0.07                                | -0.03            |
| FM Block 3                      | 0.01             | <b>0.78</b>                         | -0.15                                | 0.03             |
| FM Block 4                      | -0.05            | <b>0.76</b>                         | -0.22                                | -0.02            |
| FM Block 5                      | 0.01             | <b>0.67</b>                         | -0.40                                | 0.01             |
| FM Block 6                      | -0.2             | <b>0.74</b>                         | 0.03                                 | -0.03            |
| TL Block 2                      | -0.04            | <b>0.63</b>                         | 0.44                                 | -0.06            |
| TL Block 3                      | 0.18             | 0.35                                | 0.32                                 | -0.22            |
| TL Block 4                      | 0.12             | 0.41                                | 0.45                                 | -0.25            |
| TL Block 5                      | -0.23            | 0.43                                | <b>0.57</b>                          | -0.16            |
| TL Block 6                      | -0.11            | <b>0.66</b>                         | 0.09                                 | -0.30            |
| PL Block 2                      | -0.02            | -0.001                              | <b>0.68</b>                          | 0.08             |
| PL Block 3                      | 0.22             | -0.22                               | <b>0.58</b>                          | -0.02            |
| PL Block 4                      | 0.15             | -0.14                               | <b>0.71</b>                          | -0.09            |
| PL Block 5                      | -0.16            | -0.08                               | <b>0.80</b>                          | -0.03            |
| PL Block 6                      | -0.16            | -0.06                               | 0.09                                 | -0.45            |

Loadings > 0.5 are highlighted in bold. Abbreviations: DR = delayed recall, IR = immediate recall, RaD = recall after distraction, RAVLT = Rey Auditory Verbal Learning Test.

<sup>a</sup> Rotation method: Varimax with Kaiser normalization.

### 3.5 MANCOVA of cognitive PCs

There were significant omnibus effects of age [ $F(4,99) = 7.2$ ,  $p_{BHadj} < 0.001$ ,  $\eta_p^2 = 0.23$ ] and sex [ $F(4,99) = 22.24$ ,  $p_{BHadj} = 0.02$ ,  $\eta_p^2 = 0.14$ ]. Age affected first move latencies in the spatial navigation task [ $F(1,102) = 19.6$ ,  $p_{BHadj} < 0.001$ ,  $\eta_p^2 = 0.16$ ] such that latencies increased with age ( $r = 0.38$ ,  $p < 0.001$ ). Sex had an effect on verbal recall performance [ $F(1,102) = 10.6$ ,  $p_{BHadj} = 0.008$ ,  $\eta_p^2 = 0.16$ ] with women performing better in the RAVLT than men. There were no effects of risk.

### 3.6 Regression analysis of brain-cognition relationships

Table 4 summarizes the results of the linear hierarchical regression analyses. As age and sex had significant effects on the cognitive components, they were first entered as independent variables prior to testing for the effects of hippocampal subfield macro- and microstructure. For the PC4 Visual Recall, 16% of the data were explained by a final model that included contributions from the CA fields, i.e., CA2/3 ICSF, CA1 volume and CA1 ISOSF. In addition, 17% of the variance in the PC2 Spatial Navigation First Move Latencies was explained by age and sex. The regression models for the PC1 and PC3 were not significant.

*Table 4.* Results of hierarchical stepwise regression analyses testing first for the effects of age, sex, verbal intelligence and secondly for the effects of macro- and microstructural measurements from CA1, CA2/3, Dentate Gyrus (DG) and subiculum on cognitive components\*

| Cognitive component                            | R <sup>2</sup> | F-value<br>(p <sub>BHadj</sub> ) | Final Model predictors<br>(β, t-value, p <sub>BHadj</sub> )                                           |
|------------------------------------------------|----------------|----------------------------------|-------------------------------------------------------------------------------------------------------|
| PC1 Verbal Recall                              | 0.02           | 1.0 <i>ns</i>                    | -                                                                                                     |
| PC2 Spatial Navigation<br>First Move Latencies | 0.17           | 8.1 (0.001)                      | Age (0.35, 3.4, 0.005)<br>Sex (0.25, 2.4, 0.025)                                                      |
| PC3 Spatial Navigation<br>Path Length          | 0.02           | 0.9 <i>ns</i>                    | -                                                                                                     |
| PC4 Visual Recall                              | 0.16           | 4.1 (0.02)                       | CA1 ISOSF<br>(0.3, 2.4, 0.04)<br>CA1 volume<br>(0.23, 2.03, 0.025)<br>CA2/3 ICSF<br>(0.3, 2.8, 0.015) |

\*Accounting for age, sex, NART-R IQ, APOE, FH and WHR. ASHS = Automated

Segmentation of Hippocampal Subfields, CA = cornu Ammonis, DG = dentate gyrus, PC = principal component, FS = FreeSurfer, p<sub>BHadj</sub> = Benjamini-Hochberg adjusted p-value significant at 5% False Discovery Rate, SUB = subiculum

#### 4. Discussion

Dissociating the effects of healthy aging on hippocampal subfields from those related to genetic and lifestyle risk of dementia could be key to effectively targeting interventions for older-age memory impairments. Thus, the primary objective of the present study was to investigate age and age-independent effects of three major risk factors, i.e., carriage of the APOE ε4 genotype, a positive FH of dementia, and central obesity, on the macro- and microstructure of the hippocampal formation in a sample of 158 cognitively healthy adults.

We characterized properties of the hippocampal formation with subfield volumes based on T<sub>1</sub> and high-resolution T<sub>2</sub>-weighted images as well as with microstructural measurements from NODDI and qMT imaging to gain complementary information about apparent myelin, neurite packing, free water, and metabolism. Accounting for overlapping information between the various MRI measurements, PCA was employed to reduce the data dimensionality to three principal components that reflected myelin/neurite packing, size/complexity, and metabolic gray matter properties. These components were then investigated across the main subfields of the hippocampal formation, i.e., CA1, CA2/3, DG, and subiculum, which were shown to be particularly vulnerable to the impact of aging and disease (de Flores et al., 2015b). Subfields were segmented using two widely employed and freely available, automated segmentation protocols, i.e., ASHS and FreeSurfer (version 6). This allowed us to assess any potential interaction effects between the type of protocol and risk factors on the analysis of hippocampal subfield properties.

While type of labelling protocol and hippocampal subfields were associated with absolute differences in component measures, they did not interact with the risk factors, suggesting that risk effects did not significantly differ between ASHS and FreeSurfer segmentations. Overall ASHS segmentations resulted in larger size/complexity but lower myelin/neurite packing estimates (Figure 2). ASHS segmentations of CA1, CA2/3 and DG were larger than those of FreeSurfer while subiculum labels were larger for FreeSurfer than ASHS (Figure 3). Myelin/neurite packing signals were largest in the subiculum for both protocols but particularly so for FreeSurfer (Figure 3). Both ASHS and FreeSurfer CA2/3 labels were the smallest subfields while CA1 and DG were comparable in size/complexity. The subiculum was smaller than CA1 and CA2/3 for ASHS but larger for FreeSurfer.

These component differences were caused by disagreements in the anatomical labels between the two segmentation protocols that are known to be most pronounced at the CA1/subiculum boundary and within the anterior portion of the hippocampal formation (Yushkevich et al., 2015a). In addition, both protocols differed in the region of the hippocampal formation that was labelled and the number of subfield segmentations. While

FreeSurfer labels 12 regions (CA1, CA2/3, CA4, subiculum, presubiculum, parasubiculum, molecular layer of the subiculum and CA fields, granule cell layer of the dentate gyrus, fimbria, hippocampus-amygdala transition area, hippocampal tail, and fissure) (Iglesias et al., 2015), ASHS segments ten regions (CA1, CA2, CA3, DG, subiculum, entorhinal cortex, Brodmann area 35, Brodmann area 36, collateral sulcus and miscellaneous regions) (Yushkevich et al., 2015b). As many of these subfields were too small to extract meaningful lower resolution microstructural information, we focused on the analysis of the four main subfields of the hippocampal formation that were labelled by both protocols (CA1, CA2/3, DG and subiculum).

It should also be noted that the final ASHS segmentation outputs were in high resolution  $T_2$ -weighted space while those for FreeSurfer were in  $T_1$ -weighted space (Figure 1) suggesting differences in the use of multi-spectral information between the pipelines. A recent study found significant variations in FreeSurfer volume estimations of hippocampal subfields depending on the input images ( $T_1$  and/or  $T_2$ ) (Seiger et al., 2021). It is therefore likely that differences in the use of standard  $T_1$  and high-resolution  $T_2$ -based information may have contributed to the discrepancies observed between the two protocols. Importantly though for our primary research question, despite these significant differences between the ASHS and FreeSurfer labels, there were no interaction effects between the type of protocol and any of the three risk factors, suggesting that a comparable risk pattern was observed across both protocols.

With regards to risk factors, we observed that central obesity as measured with the WHR was associated with reductions in the myelin/neurite packing and the size/complexity but not the metabolic component (Figure 5). These findings are consistent with accumulating evidence that obesity is associated with adverse effects on the hippocampus and memory functions (Anan et al., 2010; Dekkers et al., 2019; Khan, et al., 2015; Mueller et al., 2012; Spencer et al., 2017; Stranahan, 2015; Willette and Kapogiannis, 2015). For instance, a recent analysis of data from 12,000 participants (45-76 years of age) of the UK Biobank study, reported that total body fat was related to smaller subcortical gray matter volumes

including the hippocampus in men (Dekkers et al., 2019). This study also reported obesity-related differences in whole brain white matter microstructure measured with fractional anisotropy and mean diffusivity. Similarly, previous analyses of CARDS data found WHR to be positively correlated with hippocampal atrophy [as estimated with the free water signal (ISOSF)] and negatively with fornix apparent myelin MPF and  $k_f$  (Metzler-Baddeley et al., 2019a). In this study, WHR was a close estimate of abdominal visceral but not subcutaneous fat fractions while Body Mass Index (BMI) estimated subcutaneous but not visceral fat (Metzler-Baddeley et al., 2019a). As BMI had no effects on brain microstructure, these findings suggested that the correlations between WHR and hippocampal and fornix microstructure were driven by excessive visceral rather than body fat per se, consistent with accumulating evidence for visceral fat-related adverse effects on the hippocampus, brain white matter, and mortality (Anan et al., 2010; Koster et al., 2015; Koster and Schaap, 2015; Koster et al., 2010; Lampe et al., 2019). Comparable to Dekkers et al. (2019), men were more centrally obese and had higher visceral fat fractions and higher hippocampal ISOSF (Metzler-Baddeley et al., 2019a).

Central obesity, notably excessive visceral fat, are associated with multiple metabolic alterations affecting blood cholesterol, glucose, and insulin levels, that can lead to cardio- and cerebrovascular disease and Type 2 diabetes (Dommermuth and Ewing, 2018; Whitmer et al., 2007). Central obesity at midlife may also be accompanied with systemic, low-grade inflammation (Cox et al., 2015; Guillemot-Legris and Muccioli, 2017). Diet-induced obesity in animal studies has been shown to trigger inflammation in the hippocampus, which in turn impaired synaptic functioning and spatial memory (Hao et al., 2016). In humans, individuals with a genetic polymorphism associated with pro-inflammatory state and AD risk had smaller CA1-2, CA3-DG and subiculum than healthy controls (Raz et al., 2015). All of these obesity-related metabolic changes in lipid, glucose and immune responses are thought to contribute to the risk of developing dementia in older age (Businaro et al., 2018; Profenno et al., 2010; Ricci et al., 2017).

Furthermore, it is also increasingly recognized that obesity may interact with genetic risk factors, notably *APOE*  $\epsilon$ 4 (Jones and Rebeck, 2018; Mole et al., 2020; Zade et al., 2013). Indeed, here we observed interaction effects between *APOE* and WHR on the size/complexity of the hippocampal formation. While all obese individuals showed reduced size/complexity, this effect was only significant for *APOE*  $\epsilon$ 4 non-carriers ( $p < 0.001$ ) but not for *APOE*  $\epsilon$ 4 carriers ( $p = 0.1$ ) (Figure 6). As can be seen in Figure 6, *APOE*  $\epsilon$ 4 carriers did not show a significant obesity effect because size/complexity was attenuated in normal-weighted *APOE*  $\epsilon$ 4 carriers. Thus central obesity appeared to be related to atrophy in the hippocampal formation regardless of an individual's *APOE* or FH status (as no effects of FH were present). However, *APOE*  $\epsilon$ 4 carriage alone appeared to be associated with adverse effects on the hippocampus that may have masked any metabolic and vascular benefits of a healthy WHR. Or expressed differently, keeping a healthy weight may not be sufficient to compensate for *APOE*  $\epsilon$ 4-driven hippocampal atrophy. These risk effects were present for data collapsed across all hippocampal subfields. There was no evidence for any subfield specific vulnerability to the impact of obesity and *APOE*. However, it should be noted that we observed trends for CA1, CA2/3 and DG but not the subiculum. Future larger studies are required to clarify whether these regions are particularly susceptible to obesity and *APOE*  $\epsilon$ 4 related tissue changes.

A previous analysis of data from the Framingham Offspring cohort also highlighted complex synergistic effects between *APOE* and obesity (Zade et al., 2013). They found several *APOE*-related modifications of correlations between individual differences in WHR on one hand and brain structure and cognition on the other. For instance, *APOE*  $\epsilon$ 4 carriers showed stronger negative relationships between WHR and executive and memory functions as well as larger correlations between WHR and white matter hyperintensities. Interestingly, they also reported a stronger correlation between WHR and frontal brain volume for *APOE*  $\epsilon$ 4 non-carriers similar to our observations here.

In addition, it is likely that obesity effects will be modulated by other polygenic risk factors than *APOE*  $\epsilon$ 4 (Woo and Reifman, 2018). While the CARDS sample was too small to



quantify AD and/or obesity-related polygenic risk hazards (Escott-Price et al., 2014; Escott-Price et al., 2015), we included family history of dementia as a variable that captures environmental and genetic risk factors beyond *APOE*  $\epsilon$ 4. In the present analysis of hippocampal gray matter microstructure we did not find any effect of FH, but previously we observed widespread interaction effects between *APOE*, FH, and WHR on white matter microstructure, that were most pronounced in the right parahippocampal cingulum (Mole et al., 2020). More specifically, *APOE*  $\epsilon$ 4 carriers with a positive FH, showed obesity-related reductions in apparent myelin MPF while no effects were observed for individuals without a FH. These risk-effects on apparent myelin were moderated by hypertension and inflammation-related blood markers (Mole et al., 2020).

The precise nature of these complex synergistic effects between obesity and *APOE*  $\epsilon$ 4 remain elusive and require further investigation. A recent animal study (Jones et al., 2021) points to inflammation and neuronal plasticity mechanisms underpinning interaction effects between obesity and *APOE* genotype. In this study, a high-fat diet increased gliosis and immediate-early gene expression only in *APOE*  $\epsilon$ 3 but not *APOE*  $\epsilon$ 4 knock-in mice. This suggested early dysregulation of adaptive inflammatory mechanisms in *APOE*  $\epsilon$ 4 mice that may make the brain more vulnerable to insults and damage in the long run. In addition, *APOE*  $\epsilon$ 4 is also known to lead to changes in glucose, insulin, and lipid metabolism and altered beta-amyloid production (Jones and Rebeck, 2018; Jones et al., 2019). Together, these findings suggest that *APOE*  $\epsilon$ 4 and obesity lead to metabolic alterations, including inflammatory processes, and may adversely interact with other and with other genetic factors on brain structure and function. We propose that interaction effects between *APOE*  $\epsilon$ 4 and obesity on the hippocampal formation may increase that region's vulnerability to subsequent neurodegeneration.

The effects of risk on the hippocampal formation were observed while accounting for age and sex and interaction effects between WHR and *APOE* were only present for the size/complexity component. In contrast, aging was associated with a non-linear inverted U-shaped curve of the myelin/neurite packing component akin to the trajectory of white matter

microstructure across the lifespan in humans and rhesus monkeys (Bartzokis et al., 2010; Kubicki et al., 2019; Slater et al., 2019; Yeatman et al., 2014). Myelin/neurite packing increased between the 30s and 40s, when it peaked, remained relatively stable in the 50s and 60s and declined in the 70s (Figure 4A). Age effects were present in all four subfields of the hippocampal formation, i.e., CA1, CA2/3, DG, and subiculum. We propose that this observed age trajectory in the myelin/neurite packing component most likely reflects the maturation of white matter pathways within the hippocampal formation, such as the perforant path, mossy fiber, and Schaffer collateral pathways (Zeineh et al., 2017). Indeed, age-related differences in the myelin basic protein (MBP) expression were found in the CA1, CA2/3 and DG regions of gerbils such that white matter fibers of the perforant pathway, the mossy fibers and Schaffer collaterals were reduced in older relative to younger gerbils (Ahn et al., 2017). Our findings accord with a study (Douaud et al., 2014) that employed a data-driven analysis of gray matter structural variation and identified a brain network comprising prefrontal, intraparietal, posterior cingulate, and medial temporal lobe regions whose lifespan pattern mirrored brain development and age-related degeneration. The hippocampus forms part of this network which matures during adolescence and young adulthood into midlife and shows heightened vulnerability to accelerated neurodegeneration in older age (Douaud et al., 2014). As we did not observe any age-related differences in the size/complexity and metabolic principal components, we propose that hippocampal changes across midlife and early older age may be primarily driven by changes in white matter myelin and neurite packing rather than a loss of neurons and synapses.

Finally, we tested for the effects of risk factors on cognitive performance and explored the relationship between cognitive performance and hippocampal subfield macro and microstructure. The dimensionality of the cognitive data was reduced to four components reflecting verbal and spatial episodic memory as well as spatial navigation first move latencies and path length. Macro- and microstructural measurements were average over protocol and hemisphere for each subfield. We did not observe any risk effects on cognition. This may suggest that risk-related macro- and microstructural tissue changes in the

hippocampal formation precede any cognitive impairment and/or were too subtle to induce any functional impairments in this sample of cognitively healthy adults.

In contrast, age was associated with larger latencies in the spatial navigation task due to older people taking longer to plan and initiate their first move in the virtual water maze. In addition, females performed better in the verbal recall test than males. Finally, we observed significant contributions from CA1 volume and free water content (ISOF) and CA2/3 neurite density (ICSF) to the variance in visual recall component. That meant that individuals with larger volume and neurite density in the CA fields were performing better at visual recall, which required the mental reconstruction of a complex spatial figure arrangement. Thus, although risk factors had no apparent impact on cognition it may be possible that their predispose an individual for future episodic memory deficits.

In summary, we provide novel evidence for dissociations between age and age-independent risk effects on hippocampal subfield macro- and microstructure. Non-linear age effects in myelin/neurite packing were observed in all subfields of the hippocampal formation. Central obesity was associated with reductions in myelin/neurite packing and size/complexity across all subfields, with APOE genotype modifying the effects of obesity on size/complexity. Age and sex were significantly related to performance differences in spatial navigation and recall but no effects of risk factors on cognition were present. Individual differences in CA1 and CA2/3 macro- and microstructure predicted performance in visual recall. It remains to be determined if the observed risk-related hippocampal macro- and microstructural differences may precede any future cognitive decline.

**Acknowledgements:** This research was funded by a Research Fellowship awarded to CM-B from the Alzheimer's Society and the BRACE Alzheimer's Charity (grant ref: 208). JPA is supported by the Wellcome Trust (grant 103722/Z14/Z) and BMC and SDV's contribution was supported by Wellcome Trust Senior Research Fellowship awarded to SDV (212273/Z/18/Z). We would like to thank Jilu Mole, Erika Leonaviciute, Fabrizio Fasano, John Evans, Peter Hobden and Sonya Foley-Bozorgzad for their assistance with MRI data acquisition and processing. We would also like to thank Derek A. Hamilton and Adam Hampshire for providing the virtual Morris water maze and Cambridge Brain Sciences battery tasks, Rosie Dwyer, Samantha Collins, Abbie Stark, and Emma Blenkinsop for their assistance with the collection and scoring of the cognitive and health data, and Rhodri Thomas for assistance with the *APOE* genotyping of the saliva samples.

**Conflict of interest:** The authors declare no competing financial and/or non-financial interests.

## 5. References

- Adler, D.H., Wisse, L.E.M., Ittyerah, R., Pluta, J.B., Ding, S.L., Xie, L., Wang, J., Kadivar, S., Robinson, J.L., Schuck, T., Trojanowski, J.Q., Grossman, M., Detre, J.A., Elliott, M.A., Toledo, J.B., Liu, W., Pickup, S., Miller, M.I., Das, S.R., Wolk, D.A., Yushkevich, P.A., 2018. Characterizing the human hippocampus in aging and Alzheimer's disease using a computational atlas derived from ex vivo MRI and histology. *Proc Natl Acad Sci U S A* 115(16), 4252-4257.
- Ahn, J.H., Lee, T.K., Park, J.H., Cho, J.H., Kim, I.H., Lee, J.C., Hong, S., Jeon, Y.H., Kang, I.J., Lee, Y.J., Won, M.H., Lee, C.H., 2017. Age-dependent differences in myelin basic protein expression in the hippocampus of young, adult and aged gerbils. *Lab Anim Res* 33(3), 237-243.
- Alosco, M.L., Spitznagel, M.B., Strain, G., Devlin, M., Crosby, R.D., Mitchell, J.E., Gunstad, J., 2014. Family history of Alzheimer's disease limits improvement in cognitive function after bariatric surgery. *SAGE Open Med* 2, 2050312114539477.
- Anan, F., Masaki, T., Shimomura, T., Fujiki, M., Umeno, Y., Eshima, N., Saikawa, T., Yoshimatsu, H., 2010. Abdominal visceral fat accumulation is associated with hippocampus volume in non-dementia patients with type 2 diabetes mellitus. *Neuroimage* 49(1), 57-62.
- Angelopoulou, E., Paudel, Y.N., Papageorgiou, S.G., Piperi, C., 2021. APOE Genotype and Alzheimer's Disease: The Influence of Lifestyle and Environmental Factors. *ACS Chem Neurosci* 12(15), 2749-2764.
- Arnoldussen, I.A., Kiliaan, A.J., Gustafson, D.R., 2014. Obesity and dementia: adipokines interact with the brain. *Eur Neuropsychopharmacol* 24(12), 1982-1999.
- Bartzokis, G., Lu, P.H., Tingus, K., Mendez, M.F., Richard, A., Peters, D.G., Oluwadara, B., Barrall, K.A., Finn, J.P., Villablanca, P., Thompson, P.M., Mintz, J., 2010. Lifespan trajectory of myelin integrity and maximum motor speed. *Neurobiol Aging* 31(9), 1554-1562.
- Beard, J., Officer, A., Cassels, A., 2016. The world report on ageing and health. *The Gerontologist* 56(2), 163-166

Benjamini, Y., Hochberg, Y., 1995. Controlling the false discovery rate: a practical and powerful approach to multiple testing. . Journal of the Royal Statistical Society B 57 289-300.

Beydoun, M.A., Beydoun, H.A., Wang, Y., 2008. Obesity and central obesity as risk factors for incident dementia and its subtypes: a systematic review and meta-analysis. Obes Rev 9(3), 204-218.

Bourbon-Teles, J., Bells, S., Jones, D.K., Coulthard, E., Rosser, A., Metzler-Baddeley, C., 2017. Myelin breakdown in human Huntington's disease: Multi-modal evidence from diffusion MRI and quantitative magnetization transfer. Neuroscience.

Boyle, R., Knight, S.P., De Looze, C., Carey, D., Scarlett, S., Stern, Y., Robertson, I.H., Kenny, R.A., Whelan, R., 2021. Verbal intelligence is a more robust cross-sectional measure of cognitive reserve than level of education in healthy older adults. Alzheimers Res Ther 13(1), 128.

Brown, T.I., Hasselmo, M.E., Stern, C.E., 2014. A high-resolution study of hippocampal and medial temporal lobe correlates of spatial context and prospective overlapping route memory. Hippocampus 24(7), 819-839.

Bubb, E.J., Metzler-Baddeley, C., Aggleton, J.P., 2018. The cingulum bundle: Anatomy, function, and dysfunction. Neurosci Biobehav Rev 92, 104-127.

Businaro, R., Corsi, M., Asprino, R., Di Lorenzo, C., Laskin, D., Corbo, R.M., Ricci, S., Pinto, A., 2018. Modulation of Inflammation as a Way of Delaying Alzheimer's Disease Progression: The Diet's Role. Curr Alzheimer Res 15(4), 363-380.

Callaghan, M.F., Helms, G., Lutti, A., Mohammadi, S., Weiskopf, N., 2015. A general linear relaxometry model of R1 using imaging data. Magn Reson Med 73(3), 1309-1314.

Cattell, R.B., 1952. Factor analysis. Harper, New York.

Ceckler, T., Wolff, S., Yip, V., Balaban, R., 1992. Dynamic and chemical factors affecting water proton relaxation by macromolecules., Journal of Magnetic Resonance. pp. 637-645.

- Cercignani, M., Alexander, D.C., 2006. Optimal acquisition schemes for in vivo quantitative magnetization transfer MRI. *Magn Reson Med* 56(4), 803-810.
- Chai, A.B., Lam, H.H.J., Kockx, M., Gelissen, I.C., 2021. Apolipoprotein E isoform-dependent effects on the processing of Alzheimer's amyloid- $\beta$ . *Biochim Biophys Acta Mol Cell Biol Lipids* 1866(9), 158980.
- Chamberland, M., Raven, E.P., Genc, S., Duffy, K., Descoteaux, M., Parker, G.D., Tax, C.M.W., Jones, D.K., 2019. Dimensionality reduction of diffusion MRI measures for improved tractometry of the human brain. *Neuroimage* 200, 89-100.
- Chan, D., Gallaher, L.M., Moodley, K., Minati, L., Burgess, N., Hartley, T., 2016. The 4 Mountains Test: A Short Test of Spatial Memory with High Sensitivity for the Diagnosis of Pre-dementia Alzheimer's Disease. *J Vis Exp*(116).
- Chuang, Y.F., An, Y., Bilgel, M., Wong, D.F., Troncoso, J.C., O'Brien, R.J., Breitner, J.C., Ferruci, L., Resnick, S.M., Thambisetty, M., 2016. Midlife adiposity predicts earlier onset of Alzheimer's dementia, neuropathology and presymptomatic cerebral amyloid accumulation. *Mol Psychiatry* 21(7), 910-915.
- Coad, B.M., Craig, E., Louch, R., Aggleton, J.P., Vann, S.D., Metzler-Baddeley, C., 2020. Precommissural and postcommissural fornix microstructure in healthy aging and cognition. *Brain Neurosci Adv* 4, 2398212819899316.
- Colgan, N., Siow, B., O'Callaghan, J.M., Harrison, I.F., Wells, J.A., Holmes, H.E., Ismail, O., Richardson, S., Alexander, D.C., Collins, E.C., Fisher, E.M., Johnson, R., Schwarz, A.J., Ahmed, Z., O'Neill, M.J., Murray, T.K., Zhang, H., Lythgoe, M.F., 2016. Application of neurite orientation dispersion and density imaging (NODDI) to a tau pathology model of Alzheimer's disease. *Neuroimage* 125, 739-744.
- Colon-Perez, L.M., Ibanez, K.R., Suarez, M., Torroella, K., Acuna, K., Ofori, E., Levites, Y., Vaillancourt, D.E., Golde, T.E., Chakrabarty, P., Febo, M., 2019. Neurite orientation dispersion and density imaging reveals white matter and hippocampal microstructure changes produced by Interleukin-6 in the TgCRND8 mouse model of amyloidosis. *Neuroimage* 202, 116138.

- Cox, A.J., West, N.P., Cripps, A.W., 2015. Obesity, inflammation, and the gut microbiota. *Lancet Diabetes Endocrinol* 3(3), 207-215.
- Daducci, A., Canales-Rodríguez, E.J., Zhang, H., Dyrby, T.B., Alexander, D.C., Thiran, J.P., 2015. Accelerated Microstructure Imaging via Convex Optimization (AMICO) from diffusion MRI data. *Neuroimage* 105, 32-44.
- Daugherty, A.M., Bender, A.R., Raz, N., Ofen, N., 2016. Age differences in hippocampal subfield volumes from childhood to late adulthood. *Hippocampus* 26(2), 220-228.
- de Flores, R., La Joie, R., Chételat, G., 2015a. Structural imaging of hippocampal subfields in healthy aging and Alzheimer's disease. *Neuroscience* 309, 29-50.
- de Flores, R., La Joie, R., Landeau, B., Perrotin, A., Mezenge, F., de La Sayette, V., Eustache, F., Desgranges, B., Chetelat, G., 2015b. Effects of age and Alzheimer's disease on hippocampal subfields: comparison between manual and FreeSurfer volumetry. *Hum Brain Mapp* 36(2), 463-474.
- Dekkers, I.A., Jansen, P.R., Lamb, H.J., 2019. Obesity, Brain Volume, and White Matter Microstructure at MRI: A Cross-sectional UK Biobank Study. *Radiology* 292(1), 270.
- Dickstein, D.L., Weaver, C.M., Luebke, J.I., Hof, P.R., 2013. Dendritic spine changes associated with normal aging. *Neuroscience* 251, 21-32.
- DiStefano, C., Zhu, M., Mindrila, D., 2009. Understanding and using factor scores: Considerations for the applied researcher, Practical Assessment, Research, and Evaluation.
- Dommermuth, R., Ewing, K., 2018. Metabolic Syndrome: Systems Thinking in Heart Disease. *Prim Care* 45(1), 109-129.
- Donix, M., Burggren, A.C., Suthana, N.A., Siddarth, P., Ekstrom, A.D., Krupa, A.K., Jones, M., Martin-Harris, L., Ercoli, L.M., Miller, K.J., Small, G.W., Bookheimer, S.Y., 2010. Family history of Alzheimer's disease and hippocampal structure in healthy people. *Am J Psychiatry* 167(11), 1399-1406.
- Douaud, G., Groves, A.R., Tamnes, C.K., Westlye, L.T., Duff, E.P., Engvig, A., Walhovd, K.B., James, A., Gass, A., Monsch, A.U., Matthews, P.M., Fjell, A.M., Smith, S.M.,



- Johansen-Berg, H., 2014. A common brain network links development, aging, and vulnerability to disease. *Proc Natl Acad Sci U S A* 111(49), 17648-17653.
- Dounavi, M.E., Mak, E., Wells, K., Ritchie, K., Ritchie, C.W., Su, L., O' Brien, J.T., 2020. Volumetric alterations in the hippocampal subfields of subjects at increased risk of dementia. *Neurobiol Aging* 91, 36-44.
- Eng, J., Ceckler, T.L., Balaban, R.S., 1991. Quantitative <sup>1</sup>H magnetization transfer imaging in vivo. *Magn Reson Med* 17(2), 304-314.
- Escott-Price, V., Bellenguez, C., Wang, L.S., Choi, S.H., Harold, D., Jones, L., Holmans, P., Gerrish, A., Vedernikov, A., Richards, A., DeStefano, A.L., Lambert, J.C., Ibrahim-Verbaas, C.A., Naj, A.C., Sims, R., Jun, G., Bis, J.C., Beecham, G.W., Grenier-Boley, B., Russo, G., Thornton-Wells, T.A., Denning, N., Smith, A.V., Chouraki, V., Thomas, C., Ikram, M.A., Zelenika, D., Vardarajan, B.N., Kamatani, Y., Lin, C.F., Schmidt, H., Kunkle, B., Dunstan, M.L., Vronskaya, M., Johnson, A.D., Ruiz, A., Bihoreau, M.T., Reitz, C., Pasquier, F., Hollingworth, P., Hanon, O., Fitzpatrick, A.L., Buxbaum, J.D., Campion, D., Crane, P.K., Baldwin, C., Becker, T., Gudnason, V., Cruchaga, C., Craig, D., Amin, N., Berr, C., Lopez, O.L., De Jager, P.L., Deramecourt, V., Johnston, J.A., Evans, D., Lovestone, S., Letenneur, L., Hernández, I., Rubinsztein, D.C., Eiriksdottir, G., Sleegers, K., Goate, A.M., Fiévet, N., Huentelman, M.J., Gill, M., Brown, K., Kamboh, M.I., Keller, L., Barberger-Gateau, P., McGuinness, B., Larson, E.B., Myers, A.J., Dufouil, C., Todd, S., Wallon, D., Love, S., Rogaeva, E., Gallacher, J., George-Hyslop, P.S., Clarimon, J., Lleo, A., Bayer, A., Tsuang, D.W., Yu, L., Tsolaki, M., Bossù, P., Spalletta, G., Proitsi, P., Collinge, J., Sorbi, S., Garcia, F.S., Fox, N.C., Hardy, J., Naranjo, M.C., Bosco, P., Clarke, R., Brayne, C., Galimberti, D., Scarpini, E., Bonuccelli, U., Mancuso, M., Siciliano, G., Moebus, S., Mecocci, P., Zompo, M.D., Maier, W., Hampel, H., Pilotto, A., Frank-García, A., Panza, F., Solfrizzi, V., Caffarra, P., Nacmias, B., Perry, W., Mayhaus, M., Lannfelt, L., Hakonarson, H., Pichler, S., Carrasquillo, M.M., Ingelsson, M., Beekly, D., Alvarez, V., Zou, F., Valladares, O., Younkin, S.G., Coto, E., Hamilton-Nelson, K.L., Gu, W., Razquin, C., Pastor, P., Mateo, I., Owen, M.J., Faber, K.M., Jonsson, P.V., Combarros, O., O'Donovan, M.C., Cantwell, L.B.,

Soininen, H., Blacker, D., Mead, S., Mosley, T.H., Bennett, D.A., Harris, T.B., Fratiglioni, L., Holmes, C., de Bruijn, R.F., Passmore, P., Montine, T.J., Bettens, K., Rotter, J.I., Brice, A., Morgan, K., Foroud, T.M., Kukull, W.A., Hannequin, D., Powell, J.F., Nalls, M.A., Ritchie, K., Lunetta, K.L., Kauwe, J.S., Boerwinkle, E., Riemenschneider, M., Boada, M., Hiltunen, M., Martin, E.R., Schmidt, R., Rujescu, D., Dartigues, J.F., Mayeux, R., Tzourio, C., Hofman, A., Nöthen, M.M., Graff, C., Psaty, B.M., Haines, J.L., Lathrop, M., Pericak-Vance, M.A., Launer, L.J., Van Broeckhoven, C., Farrer, L.A., van Duijn, C.M., Ramirez, A., Seshadri, S., Schellenberg, G.D., Amouyel, P., Williams, J., Consortium, U.K.B.E., (CHS), C.H.S., 2014. Gene-wide analysis detects two new susceptibility genes for Alzheimer's disease. *PLoS One* 9(6), e94661.

Escott-Price, V., Sims, R., Bannister, C., Harold, D., Vronskaya, M., Majounie, E., Badarinarayan, N., Morgan, K., Passmore, P., Holmes, C., Powell, J., Brayne, C., Gill, M., Mead, S., Goate, A., Cruchaga, C., Lambert, J.C., van Duijn, C., Maier, W., Ramirez, A., Holmans, P., Jones, L., Hardy, J., Seshadri, S., Schellenberg, G.D., Amouyel, P., Williams, J., GERAD/PERADES, consortia, I., 2015. Common polygenic variation enhances risk prediction for Alzheimer's disease. *Brain* 138(Pt 12), 3673-3684.

Feringa, F.M., van der Kant, R., 2021. Cholesterol and Alzheimer's Disease; From Risk Genes to Pathological Effects. *Front Aging Neurosci* 13, 690372.

Fischl, B., 2012. FreeSurfer. *Neuroimage* 62(2), 774-781.

Flood, D.G., Buell, S.J., Defiore, C.H., Horwitz, G.J., Coleman, P.D., 1985. Age-related dendritic growth in dentate gyrus of human brain is followed by regression in the 'oldest old'. *Brain Res* 345(2), 366-368.

Flood, D.G., Buell, S.J., Horwitz, G.J., Coleman, P.D., 1987. Dendritic extent in human dentate gyrus granule cells in normal aging and senile dementia. *Brain Res* 402(2), 205-216.

Folstein, M., Folstein, S., McHugh, P., 1975. "Mini-mental state". A practical method for grading the cognitive state of patients for the clinician. *J Psychiatr Res.* 12, 189–198.

- Geeraert, B.L., Chamberland, M., Lebel, R.M., Lebel, C., 2020. Multimodal principal component analysis to identify major features of white matter structure and links to reading. *PLoS One* 15(8), e0233244.
- Giulietti, G., Bozzali, M., Figura, V., Spanò, B., Perri, R., Marra, C., Lacidogna, G., Giubilei, F., Caltagirone, C., Cercignani, M., 2012. Quantitative magnetization transfer provides information complementary to grey matter atrophy in Alzheimer's disease brains. *Neuroimage* 59(2), 1114-1122.
- Guillemot-Legris, O., Muccioli, G.G., 2017. Obesity-Induced Neuroinflammation: Beyond the Hypothalamus. *Trends Neurosci* 40(4), 237-253.
- Hamilton, D., Driscoll, I., Sutherland, R., 2002. Human place learning in a virtual Morris water task: some important constraints on the flexibility of place navigation, *Behavioral Brain Research*. pp. 159-170.
- Hampshire, A., Highfield, R.R., Parkin, B.L., Owen, A.M., 2012. Fractionating human intelligence. *Neuron* 76(6), 1225-1237.
- Hao, S., Dey, A., Yu, X., Stranahan, A.M., 2016. Dietary obesity reversibly induces synaptic stripping by microglia and impairs hippocampal plasticity. *Brain Behav Immun* 51, 230-239.
- Harrison, N.A., Cooper, E., Dowell, N.G., Keramida, G., Voon, V., Critchley, H.D., Cercignani, M., 2015. Quantitative Magnetization Transfer Imaging as a Biomarker for Effects of Systemic Inflammation on the Brain. *Biol Psychiatry* 78(1), 49-57.
- Hartley, M., Taylor, N., Taylor, J., 2005. Subfield variations in hippocampal processing-components of a spatial navigation system. *Neural Netw* 18(5-6), 611-619.
- Henkelman, R.M., Huang, X., Xiang, Q.S., Stanisz, G.J., Swanson, S.D., Bronskill, M.J., 1993. Quantitative interpretation of magnetization transfer. *Magn Reson Med* 29(6), 759-766.
- Henkelman, R.M., Stanisz, G.J., Graham, S.J., 2001. Magnetization transfer in MRI: a review. *NMR Biomed* 14(2), 57-64.
- Hoang, T.H., Aliane, V., Manahan-Vaughan, D., 2018. Novel encoding and updating of positional, or directional, spatial cues are processed by distinct hippocampal subfields:

Evidence for parallel information processing and the "what" stream. *Hippocampus* 28(5), 315-326.

IBM, 2011. SPSS Statistics, Version 20.0. IBM Corp., Armonk, NY.

Iglesias, J.E., Augustinack, J.C., Nguyen, K., Player, C.M., Player, A., Wright, M., Roy, N., Frosch, M.P., McKee, A.C., Wald, L.L., Fischl, B., Van Leemput, K., Initiative, A.s.D.N., 2015. A computational atlas of the hippocampal formation using ex vivo, ultra-high resolution MRI: Application to adaptive segmentation of in vivo MRI. *Neuroimage* 115, 117-137.

Irfanoglu, M.O., Walker, L., Sarlls, J., Marengo, S., Pierpaoli, C., 2012. Effects of image distortions originating from susceptibility variations and concomitant fields on diffusion MRI tractography results. *Neuroimage* 61(1), 275-288.

Jack, C.R., Knopman, D.S., Jagust, W.J., Petersen, R.C., Weiner, M.W., Aisen, P.S., Shaw, L.M., Vemuri, P., Wiste, H.J., Weigand, S.D., Lesnick, T.G., Pankratz, V.S., Donohue, M.C., Trojanowski, J.Q., 2013. Tracking pathophysiological processes in Alzheimer's disease: an updated hypothetical model of dynamic biomarkers. *Lancet Neurol* 12(2), 207-216.

Jenkinson, M., Beckmann, C.F., Behrens, T.E., Woolrich, M.W., Smith, S.M., 2012. FSL. *Neuroimage* 62(2), 782-790.

Jezzard, P., Balaban, R.S., 1995. Correction for geometric distortion in echo planar images from B0 field variations. *Magn Reson Med* 34(1), 65-73.

Johnson, S.C., Christian, B.T., Okonkwo, O.C., Oh, J.M., Harding, S., Xu, G., Hillmer, A.T., Wooten, D.W., Murali, D., Barnhart, T.E., Hall, L.T., Racine, A.M., Klunk, W.E., Mathis, C.A., Bendlin, B.B., Gallagher, C.L., Carlsson, C.M., Rowley, H.A., Hermann, B.P., Dowling, N.M., Asthana, S., Sager, M.A., 2014. Amyloid burden and neural function in people at risk for Alzheimer's Disease. *Neurobiol Aging* 35(3), 576-584.

Jones, D.K., Horsfield, M.A., Simmons, A., 1999. Optimal strategies for measuring diffusion in anisotropic systems by magnetic resonance imaging. *Magn Reson Med* 42(3), 515-525.

Jones, N.S., Rebeck, G.W., 2018. The Synergistic Effects of APOE Genotype and Obesity on Alzheimer's Disease Risk. *Int J Mol Sci* 20(1).

Jones, N.S., Watson, K.Q., Rebeck, G.W., 2019. Metabolic Disturbances of a High-Fat Diet Are Dependent on APOE Genotype and Sex. *eNeuro* 6(5).

Jones, N.S., Watson, K.Q., Rebeck, G.W., 2021. High-fat diet increases gliosis and immediate early gene expression in APOE3 mice, but not APOE4 mice. *J Neuroinflammation* 18(1), 214.

Kerchner, G.A., Berdnik, D., Shen, J.C., Bernstein, J.D., Fenesy, M.C., Deutsch, G.K., Wyss-Coray, T., Rutt, B.K., 2014. APOE  $\epsilon$ 4 worsens hippocampal CA1 apical neuropil atrophy and episodic memory. *Neurology* 82(8), 691-697.

Khan, N.A., Baym, C.L., Monti, J.M., Raine, L.B., Drollette, E.S., Scudder, M.R., Moore, R.D., Kramer, A.F., Hillman, C.H., Cohen, N.J., 2015. Central adiposity is negatively associated with hippocampal-dependent relational memory among overweight and obese children. *J Pediatr* 166(2), 302-308.e301.

Khan, W., Westman, E., Jones, N., Wahlund, L.O., Mecocci, P., Vellas, B., Tsolaki, M., Kłoszewska, I., Soininen, H., Spenger, C., Lovestone, S., Muehlboeck, J.S., Simmons, A., Initiative, A.c.a.f.t.A.s.D.N., 2015. Automated Hippocampal Subfield Measures as Predictors of Conversion from Mild Cognitive Impairment to Alzheimer's Disease in Two Independent Cohorts. *Brain Topogr* 28(5), 746-759.

Klein, S., Staring, M., Murphy, K., Viergever, M.A., Pluim, J.P., 2010. elastix: a toolbox for intensity-based medical image registration. *IEEE Trans Med Imaging* 29(1), 196-205.

Knight, M.J., McCann, B., Kauppinen, R.A., Coulthard, E.J., 2016. Magnetic Resonance Imaging to Detect Early Molecular and Cellular Changes in Alzheimer's Disease. *Front Aging Neurosci* 8, 139.

Knight, M.J., Wearn, A., Coulthard, E., Kauppinen, R.A., 2019. T2 Relaxometry and Diffusion Tensor Indices of the Hippocampus and Entorhinal Cortex Improve Sensitivity and Specificity of MRI to Detect Amnesic Mild Cognitive Impairment and Alzheimer's Disease Dementia. *J Magn Reson Imaging* 49(2), 445-455.

Kodiweera, C., Alexander, A.L., Harezlak, J., McAllister, T.W., Wu, Y.C., 2016. Age effects and sex differences in human brain white matter of young to middle-aged adults: A DTI, NODDI, and q-space study. *Neuroimage* 128, 180-192.

Koster, A., Murphy, R.A., Eiriksdottir, G., Aspelund, T., Sigurdsson, S., Lang, T.F., Gudnason, V., Launer, L.J., Harris, T.B., 2015. Fat distribution and mortality: the AGES-Reykjavik Study. *Obesity (Silver Spring)* 23(4), 893-897.

Koster, A., Schaap, L.A., 2015. The effect of type 2 diabetes on body composition of older adults. *Clin Geriatr Med* 31(1), 41-49, vii-viii.

Koster, A., Stenholm, S., Alley, D.E., Kim, L.J., Simonsick, E.M., Kanaya, A.M., Visser, M., Houston, D.K., Nicklas, B.J., Tylavsky, F.A., Satterfield, S., Goodpaster, B.H., Ferrucci, L., Harris, T.B., Study, H.A., 2010. Body fat distribution and inflammation among obese older adults with and without metabolic syndrome. *Obesity (Silver Spring)* 18(12), 2354-2361.

Koutsodendris, N., Nelson, M.R., Rao, A., Huang, Y., 2021. Apolipoprotein E and Alzheimer's Disease: Findings, Hypotheses, and Potential Mechanisms. *Annu Rev Pathol.*  
Kubicki, M., Baxi, M., Pasternak, O., Tang, Y., Karmacharya, S., Chunga, N., Lyall, A.E., Rathi, Y., Eckbo, R., Bouix, S., Mortazavi, F., Papadimitriou, G., Shenton, M.E., Westin, C.F., Killiany, R., Makris, N., Rosene, D.L., 2019. Lifespan Trajectories of White Matter Changes in Rhesus Monkeys. *Cereb Cortex* 29(4), 1584-1593.

Kyle, C.T., Smuda, D.N., Hassan, A.S., Ekstrom, A.D., 2015. Roles of human hippocampal subfields in retrieval of spatial and temporal context. *Behav Brain Res* 278, 549-558.

La Joie, R., Fouquet, M., Mezenge, F., Landeau, B., Villain, N., Mevel, K., Pelerin, A., Eustache, F., Desgranges, B., Chetelat, G., 2010. Differential effect of age on hippocampal subfields assessed using a new high-resolution 3T MR sequence. *Neuroimage* 53(2), 506-514.

Lakens, D., 2014. Performing high-powered studies efficiently with sequential analyses: Sequential analyses. *European Journal of Social Psychology* 44(7), 701-710.

- Lampe, L., Zhang, R., Beyer, F., Huhn, S., Kharabian Masouleh, S., Preusser, S., Bazin, P.L., Schroeter, M.L., Villringer, A., Witte, A.V., 2019. Visceral obesity relates to deep white matter hyperintensities via inflammation. *Ann Neurol* 85(2), 194-203.
- Leemans A, Jeurissen B, Sijbers J, DK., J., 2009. ExploreDTI: a graphical toolbox for processing, analyzing, and visualizing diffusion MR data., 17th Annual Meeting of Intl Soc Mag Reson Med. Hawaii, USA., p. 3537.
- Leemans, A., Jones, D.K., 2009. The B-matrix must be rotated when correcting for subject motion in DTI data. *Magn Reson Med* 61(6), 1336-1349.
- Lindberg, O., Mårtensson, G., Stomrud, E., Palmqvist, S., Wahlund, L.O., Westman, E., Hansson, O., 2017. Atrophy of the Posterior Subiculum Is Associated with Memory Impairment, Tau- and A $\beta$  Pathology in Non-demented Individuals. *Front Aging Neurosci* 9, 306.
- Liu, C.C., Kanekiyo, T., Xu, H., Bu, G., 2013. Apolipoprotein E and Alzheimer disease: risk, mechanisms and therapy. *Nat Rev Neurol* 9(2), 106-118.
- Malykhin, N.V., Huang, Y., Hrybowski, S., Olsen, F., 2017. Differential vulnerability of hippocampal subfields and anteroposterior hippocampal subregions in healthy cognitive aging. *Neurobiol Aging* 59, 121-134.
- Menzler, K., Hamer, H.M., Mross, P., Rosenow, F., Deichmann, R., Wagner, M., Gracien, R.M., Doerfler, A., Bluemcke, I., Coras, R., Belke, M., Knake, S., 2021. Validation of automatic MRI hippocampal subfield segmentation by histopathological evaluation in patients with temporal lobe epilepsy. *Seizure* 87, 94-102.
- Metzler-Baddeley, C., Foley, S., de Santis, S., Charron, C., Hampshire, A., Caeyenberghs, K., Jones, D.K., 2017. Dynamics of White Matter Plasticity Underlying Working Memory Training: Multimodal Evidence from Diffusion MRI and Relaxometry. *J Cogn Neurosci* 29(9), 1509-1520.
- Metzler-Baddeley, C., Hunt, S., Jones, D.K., Leemans, A., Aggleton, J.P., O'Sullivan, M.J., 2012. Temporal association tracts and the breakdown of episodic memory in mild cognitive impairment. *Neurology* 79(23), 2233-2240.



Metzler-Baddeley, C., Mole, J., Leonaviciute, E., Sims, R., Kelso-Mitchell, A., Gidney, F., Fasano, F., Evans, J., Kidd, E., Ertefai, B., Jones, D., Baddeley, R., 2019a. Sex-specific effects of central adiposity and inflammatory markers on limbic microstructure., *NeuroImage*. pp. 793-803.

Metzler-Baddeley, C., Mole, J., Sims, R., Fasano, F., Evans, J., Jones, D., Aggleton, J., Baddeley, R., 2019b. Fornix white matter glia damage causes hippocampal gray matter damage during age-dependent limbic decline, *Scientific Reports*. Nature Publishing Group p. 1060.

Mizutani, M., Sone, D., Sano, T., Kimura, Y., Maikusa, N., Shigemoto, Y., Goto, Y., Takao, M., Iwasaki, M., Matsuda, H., Sato, N., Saito, Y., 2021. Histopathological validation and clinical correlates of hippocampal subfield volumetry based on T2-weighted MRI in temporal lobe epilepsy with hippocampal sclerosis. *Epilepsy Res* 177, 106759.

Mole, J., Fasano, F., Evans, J., Sims, R., Hamilton, D., Kidd, E., Metzler-Baddeley, C., 2020. Genetic risk of dementia modifies obesity effects on white matter myelin in cognitively healthy adults., *Neurobiology of Aging*.

Mueller, K., Sacher, J., Arelin, K., Holiga, S., Kratzsch, J., Villringer, A., Schroeter, M.L., 2012. Overweight and obesity are associated with neuronal injury in the human cerebellum and hippocampus in young adults: a combined MRI, serum marker and gene expression study. *Transl Psychiatry* 2, e200.

Mueller, S.G., Schuff, N., Raptentsetsang, S., Elman, J., Weiner, M.W., 2008. Selective effect of Apo e4 on CA3 and dentate in normal aging and Alzheimer's disease using high resolution MRI at 4 T. *Neuroimage* 42(1), 42-48.

Mueller, S.G., Weiner, M.W., 2009. Selective effect of age, Apo e4, and Alzheimer's disease on hippocampal subfields. *Hippocampus* 19(6), 558-564.

Nazeri, A., Chakravarty, M.M., Rotenberg, D.J., Rajji, T.K., Rath, Y., Michailovich, O.V., Voineskos, A.N., 2015. Functional consequences of neurite orientation dispersion and density in humans across the adult lifespan. *J Neurosci* 35(4), 1753-1762.

Nelson, H.E., 1991. The National Adult Reading Test-Revised (NART-R): Test



manual. National Foundation for Educational Research-Nelson., Windsor, UK.

Organisation, W.H., 2008. Waist Circumference and Waist-Hip-Ratio: Report of a WHO expert consultation.

Owen, A.M., Hampshire, A., Grahn, J.A., Stenton, R., Dajani, S., Burns, A.S., Howard, R.J., Ballard, C.G., 2010. Putting brain training to the test. *Nature* 465(7299), 775-778.

Peditizi, E., Peters, R., Beckett, N., 2016. The risk of overweight/obesity in mid-life and late life for the development of dementia: a systematic review and meta-analysis of longitudinal studies. *Age Ageing* 45(1), 14-21.

Penke, L., Muñoz Maniega, S., Murray, C., Gow, A.J., Hernández, M.C., Clayden, J.D., Starr, J.M., Wardlaw, J.M., Bastin, M.E., Deary, I.J., 2010. A general factor of brain white matter integrity predicts information processing speed in healthy older people. *J Neurosci* 30(22), 7569-7574.

Profenno, L.A., Porsteinsson, A.P., Faraone, S.V., 2010. Meta-analysis of Alzheimer's disease risk with obesity, diabetes, and related disorders. *Biol Psychiatry* 67(6), 505-512.

Ramani, A., Dalton, C., Miller, D.H., Tofts, P.S., Barker, G.J., 2002. Precise estimate of fundamental in-vivo MT parameters in human brain in clinically feasible times. *Magn Reson Imaging* 20(10), 721-731.

Raz, N., 2001. Ageing and the brain. *Encyclopedia of Life Sciences*, 1-6.

Raz, N., Daugherty, A.M., Bender, A.R., Dahle, C.L., Land, S., 2015. Volume of the hippocampal subfields in healthy adults: differential associations with age and a pro-inflammatory genetic variant. *Brain Struct Funct* 220(5), 2663-2674.

Reiter, K., Nielson, K.A., Durgerian, S., Woodard, J.L., Smith, J.C., Seidenberg, M., Kelly, D.A., Rao, S.M., 2017. Five-Year Longitudinal Brain Volume Change in Healthy Elders at Genetic Risk for Alzheimer's Disease. *J Alzheimers Dis* 55(4), 1363-1377.

Rey, A., 1941. L'examen psychologique dans les cas d'encephalopathie traumatique., *Archives de Psychologie*. pp. 215-285.

- Ricci, G., Pirillo, I., Tomassoni, D., Sirignano, A., Grappasonni, I., 2017. Metabolic syndrome, hypertension, and nervous system injury: Epidemiological correlates. *Clin Exp Hypertens* 39(1), 8-16.
- Schmidt, M., 1996. Rey Auditory and Verbal Learning Test. A handbook. Western Psychological Association, Los Angeles.
- Schmierer, K., Tozer, D.J., Scaravilli, F., Altmann, D.R., Barker, G.J., Tofts, P.S., Miller, D.H., 2007. Quantitative magnetization transfer imaging in postmortem multiple sclerosis brain. *J Magn Reson Imaging* 26(1), 41-51.
- Seiger, R., Hammerle, F.P., Godbersen, G.M., Reed, M.B., Spurny-Dworak, B., Handschuh, P., Klöbl, M., Unterholzner, J., Gryglewski, G., Vanicek, T., Lanzenberger, R., 2021. Comparison and Reliability of Hippocampal Subfield Segmentations Within FreeSurfer Utilizing T1- and T2-Weighted Multispectral MRI Data. *Front Neurosci* 15, 666000.
- Slater, D.A., Melie-Garcia, L., Preisig, M., Kherif, F., Lutti, A., Draganski, B., 2019. Evolution of white matter tract microstructure across the life span. *Hum Brain Mapp* 40(7), 2252-2268.
- Sled, J.G., 2017. Modelling and interpretation of magnetization transfer imaging in the brain. *Neuroimage*.
- Spencer, S.J., D'Angelo, H., Soch, A., Watkins, L.R., Maier, S.F., Barrientos, R.M., 2017. High-fat diet and aging interact to produce neuroinflammation and impair hippocampal- and amygdalar-dependent memory. *Neurobiol Aging* 58, 88-101.
- Stranahan, A.M., 2015. Models and mechanisms for hippocampal dysfunction in obesity and diabetes. *Neuroscience* 309, 125-139.
- Tang, X., Cai, F., Ding, D.X., Zhang, L.L., Cai, X.Y., Fang, Q., 2018. Magnetic resonance imaging relaxation time in Alzheimer's disease. *Brain Res Bull* 140, 176-189.
- Tanzi, R.E., 2012. The genetics of Alzheimer disease. *Cold Spring Harb Perspect Med* 2(10).
- Tardif, C.L., Devenyi, G.A., Amaral, R.S.C., Pelleieux, S., Poirier, J., Rosa-Neto, P., Breitner, J., Chakravarty, M.M., Group, P.-A.R., 2018. Regionally specific changes in the hippocampal

circuitry accompany progression of cerebrospinal fluid biomarkers in preclinical Alzheimer's disease. *Hum Brain Mapp* 39(2), 971-984.

Tuch, D.S., Reese, T.G., Wiegell, M.R., Makris, N., Belliveau, J.W., Wedeen, V.J., 2002.

High angular resolution diffusion imaging reveals intravoxel white matter fiber heterogeneity.

*Magn Reson Med* 48(4), 577-582.

Uribe, C., Segura, B., Baggio, H.C., Campabadal, A., Abos, A., Compta, Y., Marti, M.J.,

Valdeoriola, F., Bargallo, N., Junque, C., 2018. Differential Progression of Regional

Hippocampal Atrophy in Aging and Parkinson's Disease. *Front Aging Neurosci* 10, 325.

Veldsman, M., Nobis, L., Alfaro-Almagro, F., Manohar, S., Husain, M., 2021. The human

hippocampus and its subfield volumes across age, sex and APOE e4 status. *Brain Commun*

3(1), fcaa219.

Whitmer, R.A., Gunderson, E.P., Quesenberry, C.P., Zhou, J., Yaffe, K., 2007. Body mass

index in midlife and risk of Alzheimer disease and vascular dementia. *Curr Alzheimer Res*

4(2), 103-109.

Willette, A.A., Kapogiannis, D., 2015. Does the brain shrink as the waist expands? *Ageing*

*Res Rev* 20, 86-97.

Wisse, L.E., Biessels, G.J., Heringa, S.M., Kuijf, H.J., Koek, D.H., Luijten, P.R., Geerlings,

M.I., Utrecht Vascular Cognitive Impairment Study, G., 2014. Hippocampal subfield volumes

at 7T in early Alzheimer's disease and normal aging. *Neurobiol Aging* 35(9), 2039-2045.

Wolf, D., Fischer, F.U., de Flores, R., Chetelat, G., Fellgiebel, A., 2015. Differential

associations of age with volume and microstructure of hippocampal subfields in healthy

older adults. *Hum Brain Mapp* 36(10), 3819-3831.

Wolf, P.A., 2012. Contributions of the Framingham Heart Study to stroke and dementia

epidemiologic research at 60 years. *Arch Neurol* 69(5), 567-571.

Woo, H.J., Reifman, J., 2018. Genetic interaction effects reveal lipid-metabolic and

inflammatory pathways underlying common metabolic disease risks. *BMC Med Genomics*

11(1), 54.

Xu, W.L., Atti, A.R., Gatz, M., Pedersen, N.L., Johansson, B., Fratiglioni, L., 2011. Midlife overweight and obesity increase late-life dementia risk: a population-based twin study. *Neurology* 76(18), 1568-1574.

Yeatman, J.D., Wandell, B.A., Mezer, A.A., 2014. Lifespan maturation and degeneration of human brain white matter. *Nat Commun* 5, 4932.

Yu, J., Lam, C.L.M., Lee, T.M.C., 2017. White matter microstructural abnormalities in amnesic mild cognitive impairment: A meta-analysis of whole-brain and ROI-based studies. *Neurosci Biobehav Rev* 83, 405-416.

Yushkevich, P.A., Amaral, R.S., Augustinack, J.C., Bender, A.R., Bernstein, J.D., Boccardi, M., Bocchetta, M., Burggren, A.C., Carr, V.A., Chakravarty, M.M., Chetelat, G., Daugherty, A.M., Davachi, L., Ding, S.L., Ekstrom, A., Geerlings, M.I., Hassan, A., Huang, Y., Iglesias, J.E., La Joie, R., Kerchner, G.A., LaRocque, K.F., Libby, L.A., Malykhin, N., Mueller, S.G., Olsen, R.K., Palombo, D.J., Parekh, M.B., Pluta, J.B., Preston, A.R., Pruessner, J.C., Ranganath, C., Raz, N., Schlichting, M.L., Schoemaker, D., Singh, S., Stark, C.E., Suthana, N., Tompariy, A., Turowski, M.M., Van Leemput, K., Wagner, A.D., Wang, L., Winterburn, J.L., Wisse, L.E., Yassa, M.A., Zeineh, M.M., Hippocampal Subfields, G., 2015a.

Quantitative comparison of 21 protocols for labeling hippocampal subfields and parahippocampal subregions in in vivo MRI: towards a harmonized segmentation protocol. *Neuroimage* 111, 526-541.

Yushkevich, P.A., Pluta, J.B., Wang, H., Xie, L., Ding, S.L., Gertje, E.C., Mancuso, L., Klot, D., Das, S.R., Wolk, D.A., 2015b. Automated volumetry and regional thickness analysis of hippocampal subfields and medial temporal cortical structures in mild cognitive impairment. *Hum Brain Mapp* 36(1), 258-287.

Zade, D., Beiser, A., McGlinchey, R., Au, R., Seshadri, S., Palumbo, C., Wolf, P.A., DeCarli, C., Milberg, W., 2013. Apolipoprotein epsilon 4 allele modifies waist-to-hip ratio effects on cognition and brain structure. *J Stroke Cerebrovasc Dis* 22(2), 119-125.

Zeineh, M.M., Palomero-Gallagher, N., Axer, M., Gräßel, D., Goubran, M., Wree, A., Woods, R., Amunts, K., Zilles, K., 2017. Direct Visualization and Mapping of the Spatial Course of

Fiber Tracts at Microscopic Resolution in the Human Hippocampus. *Cereb Cortex* 27(3), 1779-1794.

Zhang, H., Schneider, T., Wheeler-Kingshott, C.A., Alexander, D.C., 2012. NODDI: practical in vivo neurite orientation dispersion and density imaging of the human brain. *Neuroimage* 61(4), 1000-1016.
